# Supplementary material
Source: publisher figshare collection journal article supplement (https://rs.figshare.com/ndownloader/files/18505757)
Supplement: Supplementary file 1 [file 18505757]

**Appendix**

Here we include simulations, and experimental details and a full stimulus lists for Experiments 1 and 2.

**Simulations**

We ran a series of simulations following those of Hummel (2011). Specifically, we simulated the similarity of various role-filler pairs using cosine similarity under tensor product binding (TP), synchrony-based binding (SB), and asynchrony-based dynamic binding (ADB). We ran the simulations using role and filler representations that come from a shared feature space (e.g., word2vec).

Using 12 dimensional vectors, we created a base role and filler, and then created permuted versions of the role and filler to match for similarity 0.5, and similarity 0.0, and similarity -1.0. Figures S1-S3 show the results of using TP, SB, and ADB respectively.


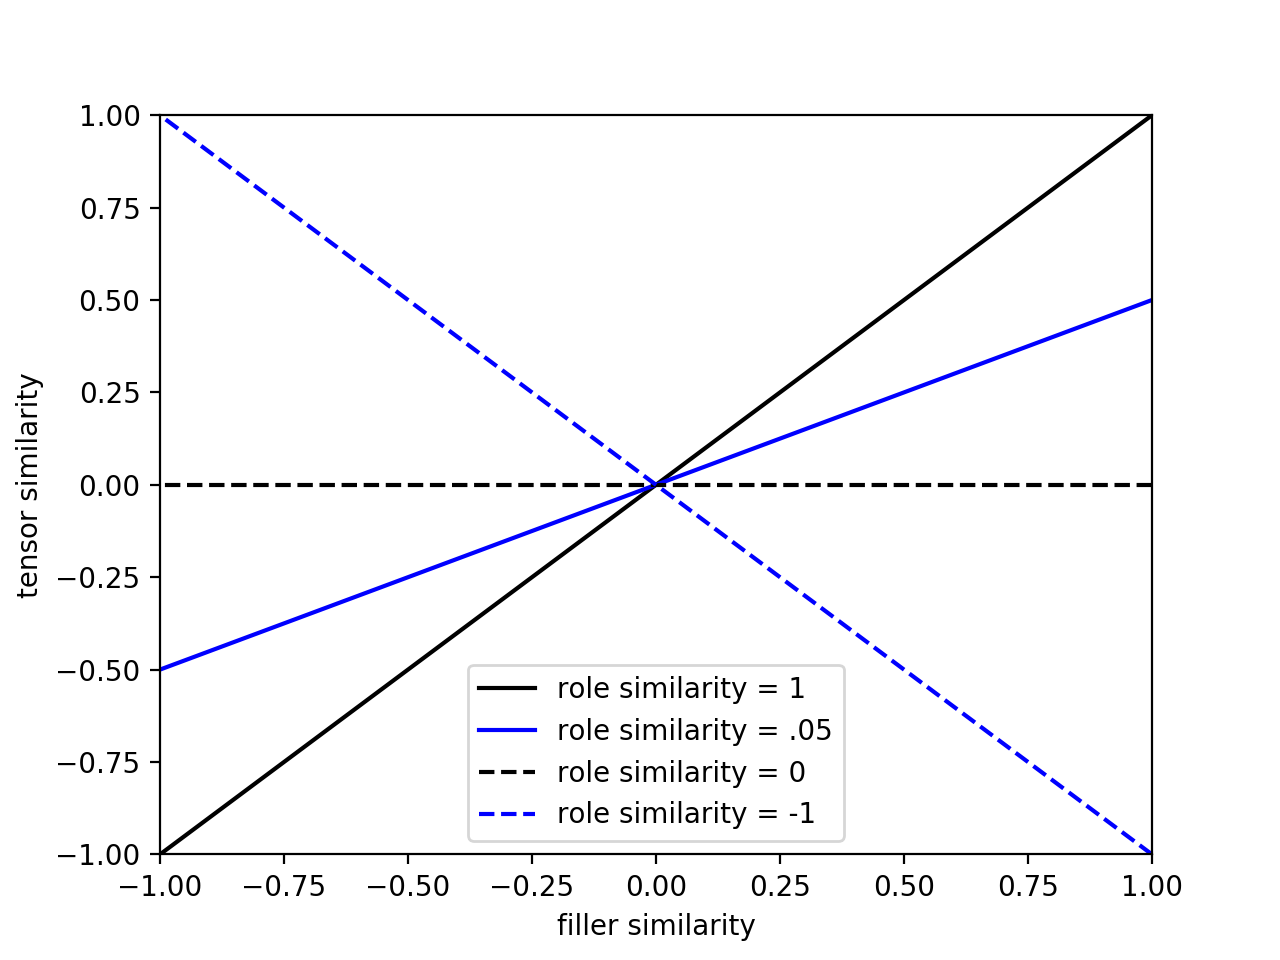
Figure S1. Cosine similarity of two role-filler pairs bound by **tensor-product** as a function of role and filler similarity.


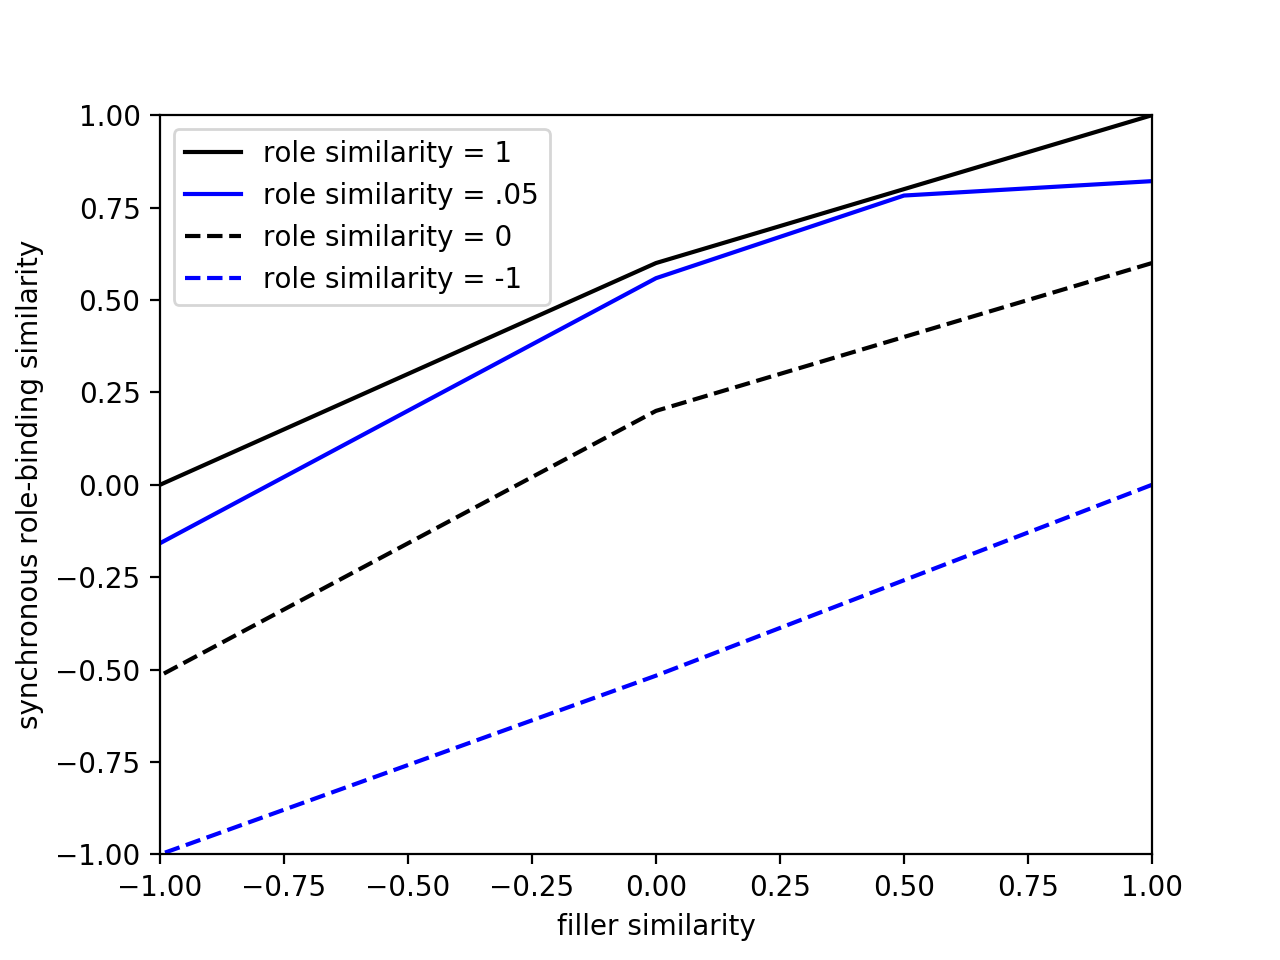


Figure S2. Cosine similarity of two role-filler pairs bound by **synchrony** as a function of role and filler similarity.


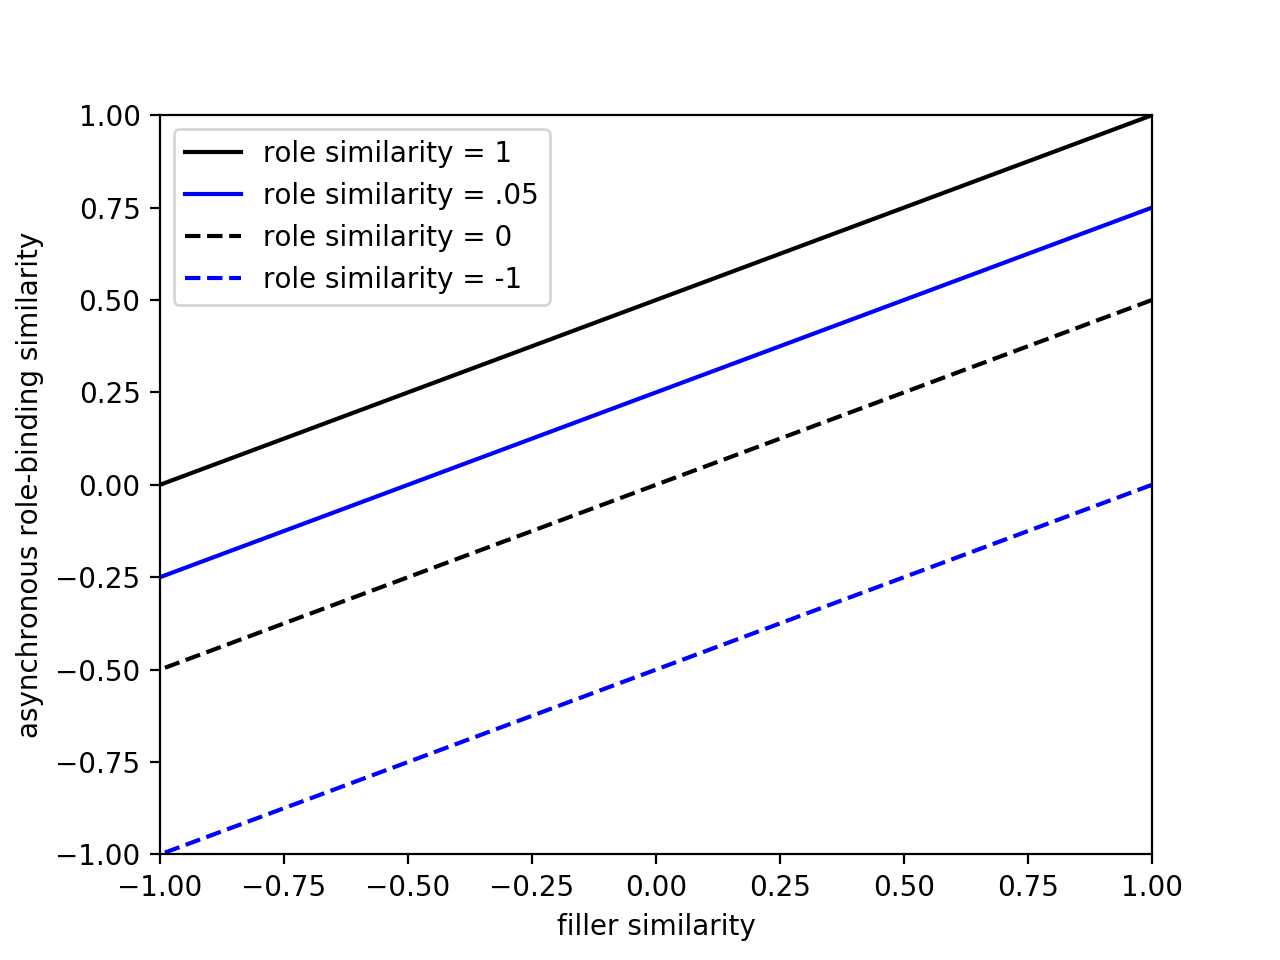


Figure S3. Cosine similarity of two role-filler pairs bound by **asynchrony** as a function of role and filler similarity.

In addition, we ran a simulation using independent dimensions to encode roles and filler. Results for TP and ADB were identical, but SB showed a pattern of results identical to those demonstrated by Hummel (2011). When roles and fillers are coded using independent dimensions, SB shows a pattern identical to ADB (see Fig. S4).


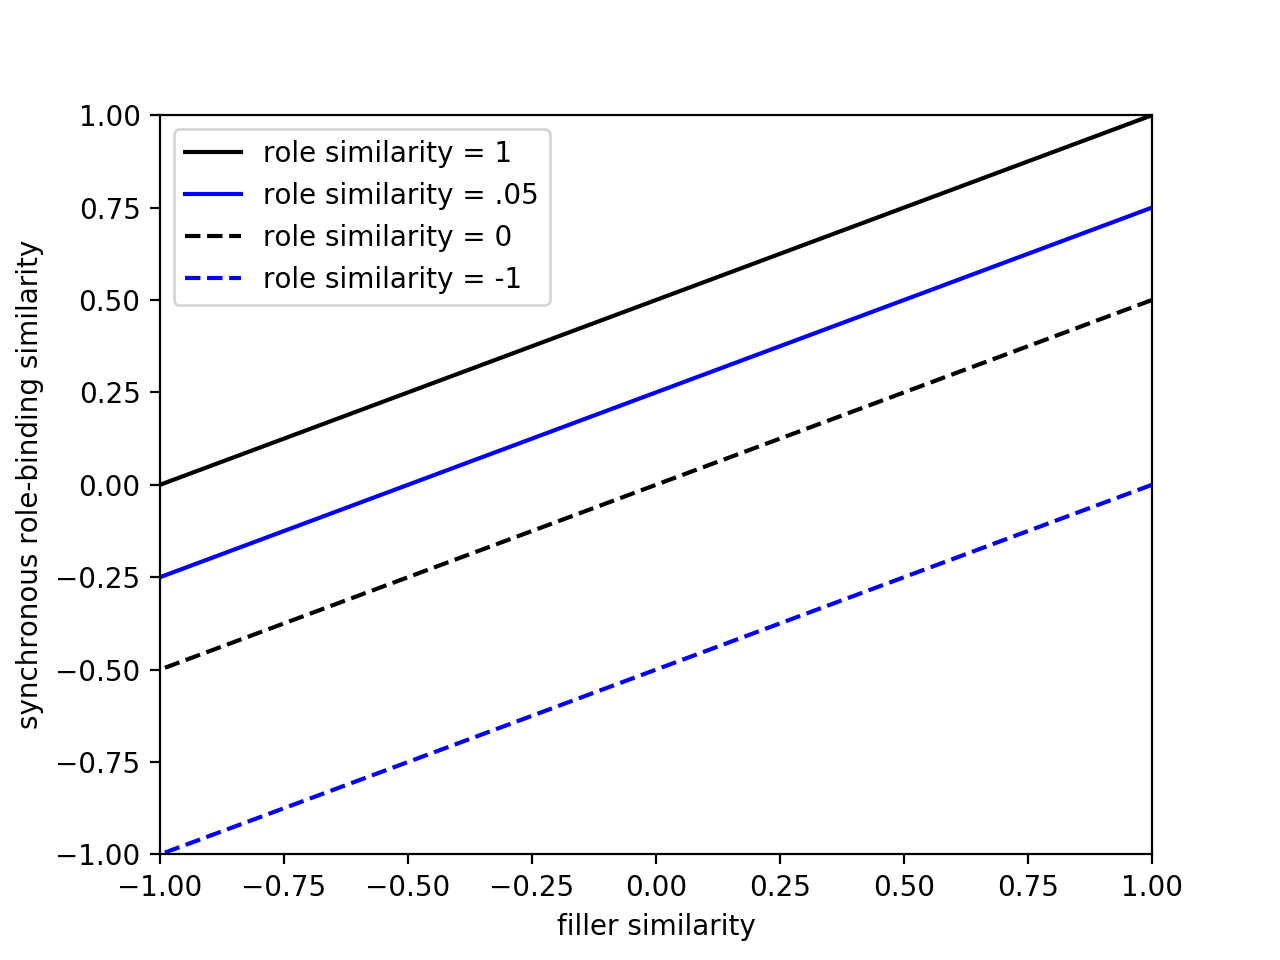


Figure S4. Cosine similarity of two role-filler pairs bound by **synchrony** as a function of role and filler similarity, with roles and fillers coded using independent dimensions.

We note that binding by synchrony has been instantiated in neural networks in various forms since the early 1990s (Hummel & Holyoak, 1997; Shastri, 1999; von der Malsburg, 1995). However, synchrony-based systems do not learn predicates from unstructured data because they cannot separate predicates from their arguments without implementing separate data types a priori.

**Experimental details Experiment 1**

**Instructions Experiment 1**

- You will be reading pairs of words on the computer screen.
- After reading both pairs, you have to judge on a scale how similar the words are on the basis of meaning.
- You can do this by moving the scale to the left or to the right with the arrow keys on the keyboard
- Do this as quickly as possible, but also try to be accurate.
- Use your intuition/first judgement to rate the words.
- There will be two blocks; you are allowed to take a short break in between the blocks.

**Stimuli Experiment 1**

*Table 1: examples of the different kind of stimuli*

| **Condition** | **Stimuli** |
| --- | --- |
| Same noun | slager vs. slager |
| Different noun | slager vs. groentenman |
| Different noun | groentenman vs. slager |
| Same noun | groentenman vs. groentenman |
| Same predicate | bereidt vs. bereidt |
| Different predicate | bereidt vs. schildert |
| Different predicate | schildert vs. bereidt |
| Same predicate | schildert vs. schildert |

**Complete list of Stimuli Experiment 1**

**Word lists**

NOUNS

| **condition** | **word1** | **word2** |
| --- | --- | --- |
| same noun | acrobaat | acrobaat |
| different noun | acrobaat | goochelaar |
| different noun | goochelaar | acrobaat |
| same noun | goochelaar | goochelaar |
| same noun | acteur | acteur |
| different noun | acteur | bezoeker |
| different noun | bezoeker | acteur |
| same noun | bezoeker | bezoeker |
| same noun | activist | activist |
| different noun | activist | moordenaar |
| different noun | moordenaar | activist |
| same noun | moordenaar | moordenaar |
| same noun | agent | agent |
| different noun | agent | monteur |
| different noun | monteur | agent |
| same noun | monteur | monteur |
| same noun | brandweerman | brandweerman |
| different noun | brandweerman | dirigent |
| different noun | dirigent | brandweerman |
| same noun | dirigent | dirigent |
| same noun | chirurg | chirurg |
| different noun | chirurg | huisarts |
| different noun | huisarts | chirurg |
| same noun | huisarts | huisarts |
| same noun | conducteur | conducteur |
| different noun | conducteur | machinist |
| different noun | machinist | conducteur |
| same noun | machinist | machinist |
| same noun | crimineel | crimineel |
| different noun | crimineel | stalker |
| different noun | stalker | crimineel |
| same noun | stalker | stalker |
| same noun | dief | dief |
| different noun | dief | minister |
| different noun | minister | dief |
| same noun | minister | minister |
| same noun | gijzelaar | gijzelaar |
| different noun | gijzelaar | orthodontist |
| different noun | orthodontist | gijzelaar |
| same noun | orthodontist | orthodontist |
| same noun | gitarist | gitarist |
| different noun | gitarist | zanger |
| different noun | zanger | gitarist |
| same noun | zanger | zanger |
| same noun | groenteman | groenteman |
| different noun | groenteman | slager |
| different noun | slager | groenteman |
| same noun | slager | slager |
| same noun | hertog | hertog |
| different noun | hertog | koning |
| different noun | koning | hertog |
| same noun | koning | koning |
| same noun | inspecteur | inspecteur |
| different noun | inspecteur | slachtoffer |
| different noun | slachtoffer | inspecteur |
| same noun | slachtoffer | slachtoffer |
| same noun | jager | jager |
| different noun | jager | kapper |
| different noun | kapper | jager |
| same noun | kapper | kapper |
| same noun | jongen | jongen |
| different noun | jongen | meisje |
| different noun | meisje | jongen |
| same noun | meisje | meisje |
| same noun | kind | kind |
| different noun | kind | psycholoog |
| different noun | psycholoog | kind |
| same noun | psycholoog | psycholoog |
| same noun | leraar | leraar |
| different noun | leraar | verpleegster |
| different noun | verpleegster | leraar |
| same noun | verpleegster | verpleegster |
| same noun | meester | meester |
| different noun | meester | slaaf |
| different noun | slaaf | meester |
| same noun | slaaf | slaaf |
| same noun | moeder | moeder |
| different noun | moeder | vader |
| different noun | vader | moeder |
| same noun | vader | vader |
| same noun | piraat | piraat |
| different noun | piraat | smid |
| different noun | smid | piraat |
| same noun | smid | smid |
| same noun | prins | prins |
| different noun | prins | prinses |
| different noun | prinses | prins |
| same noun | prinses | prinses |
| same noun | redacteur | redacteur |
| different noun | redacteur | schrijver |
| different noun | schrijver | redacteur |
| same noun | schrijver | schrijver |
| same noun | scholier | scholier |
| different noun | scholier | student |
| different noun | student | scholier |
| same noun | student | student |

PREDICATES

| **condition** | **word1** | **word2** |
| --- | --- | --- |
| same predicate | bakt | bakt |
| different predicate | bakt | zit |
| different predicate | zit | bakt |
| same predicate | zit | zit |
| same predicate | bedrieglijke | bedrieglijke |
| different predicate | bedrieglijke | kwaadaardige |
| different predicate | kwaadaardige | bedrieglijke |
| same predicate | kwaadaardige | kwaadaardige |
| same predicate | bereidt | bereidt |
| different predicate | bereidt | schildert |
| different predicate | schildert | bereidt |
| same predicate | schildert | schildert |
| same predicate | beschermt | beschermt |
| different predicate | beschermt | verdedigt |
| different predicate | verdedigt | beschermt |
| same predicate | verdedigt | verdedigt |
| same predicate | besproeit | besproeit |
| different predicate | besproeit | geeft |
| different predicate | geeft | besproeit |
| same predicate | geeft | geeft |
| same predicate | betovert | betovert |
| different predicate | betovert | hypnotiseert |
| different predicate | hypnotiseert | betovert |
| same predicate | hypnotiseert | hypnotiseert |
| same predicate | betreedt | betreedt |
| different predicate | betreedt | verlaat |
| different predicate | verlaat | betreedt |
| same predicate | verlaat | verlaat |
| same predicate | bidt | bidt |
| different predicate | bidt | helpt |
| different predicate | helpt | bidt |
| same predicate | helpt | helpt |
| same predicate | blauwe | blauwe |
| different predicate | blauwe | rode |
| different predicate | rode | blauwe |
| same predicate | rode | rode |
| same predicate | blije | blije |
| different predicate | blije | teleurgestelde |
| different predicate | teleurgestelde | blije |
| same predicate | teleurgestelde | teleurgestelde |
| same predicate | botte | botte |
| different predicate | botte | onbeleefde |
| different predicate | onbeleefde | botte |
| same predicate | onbeleefde | onbeleefde |
| same predicate | boze | boze |
| different predicate | boze | verdrietige |
| different predicate | verdrietige | boze |
| same predicate | verdrietige | verdrietige |
| same predicate | brabbelt | brabbelt |
| different predicate | brabbelt | citeert |
| different predicate | citeert | brabbelt |
| same predicate | citeert | citeert |
| same predicate | bruine | bruine |
| different predicate | bruine | luidruchtige |
| different predicate | luidruchtige | bruine |
| same predicate | luidruchtige | luidruchtige |
| same predicate | controleert | controleert |
| different predicate | controleert | onderzoekt |
| different predicate | onderzoekt | controleert |
| same predicate | onderzoekt | onderzoekt |
| same predicate | dankbare | dankbare |
| different predicate | dankbare | trouwe |
| different predicate | trouwe | dankbare |
| same predicate | trouwe | trouwe |
| same predicate | danst | danst |
| different predicate | danst | valt aan |
| different predicate | valt aan | danst |
| same predicate | valt aan | valt aan |
| same predicate | dappere | dappere |
| different predicate | dappere | heldhaftige |
| different predicate | heldhaftige | dappere |
| same predicate | heldhaftige | heldhaftige |
| same predicate | depressieve | depressieve |
| different predicate | depressieve | sombere |
| different predicate | sombere | depressieve |
| same predicate | sombere | sombere |
| same predicate | doffe | doffe |
| different predicate | doffe | nieuwe |
| different predicate | nieuwe | doffe |
| same predicate | nieuwe | nieuwe |
| same predicate | dove | dove |
| different predicate | dove | knappe |
| different predicate | knappe | dove |
| same predicate | knappe | knappe |
| same predicate | dramatische | dramatische |
| different predicate | dramatische | enge |
| different predicate | enge | dramatische |
| same predicate | enge | enge |
| same predicate | drinkt | drinkt |
| different predicate | drinkt | eet |
| different predicate | eet | drinkt |
| same predicate | eet | eet |
| same predicate | drukke | drukke |
| different predicate | drukke | oranje |
| different predicate | oranje | drukke |
| same predicate | oranje | oranje |
| same predicate | energieke | energieke |
| different predicate | energieke | vermoeide |
| different predicate | vermoeide | energieke |
| same predicate | vermoeide | vermoeide |
| same predicate | fantastische | fantastische |
| different predicate | fantastische | geweldige |
| different predicate | geweldige | fantastische |
| same predicate | geweldige | geweldige |
| same predicate | fluit | fluit |
| different predicate | fluit | wijst af |
| different predicate | wijst af | fluit |
| same predicate | wijst af | wijst af |
| same predicate | fraudeert | fraudeert |
| different predicate | fraudeert | sterft |
| different predicate | sterft | fraudeert |
| same predicate | sterft | sterft |
| same predicate | geschikte | geschikte |
| different predicate | geschikte | matige |
| different predicate | matige | geschikte |
| same predicate | matige | matige |
| same predicate | gladde | gladde |
| different predicate | gladde | groene |
| different predicate | groene | gladde |
| same predicate | groene | groene |
| same predicate | glanzende | glanzende |
| different predicate | glanzende | glimmende |
| different predicate | glimmende | glanzende |
| same predicate | glimmende | glimmende |
| same predicate | glinsterende | glinsterende |
| different predicate | glinsterende | paarse |
| different predicate | paarse | glinsterende |
| same predicate | paarse | paarse |
| same predicate | gooit | gooit |
| different predicate | gooit | vangt |
| different predicate | vangt | gooit |
| same predicate | vangt | vangt |
| same predicate | harde | harde |
| different predicate | harde | ruwe |
| different predicate | ruwe | harde |
| same predicate | ruwe | ruwe |
| same predicate | jonge | jonge |
| different predicate | jonge | zachte |
| different predicate | zachte | jonge |
| same predicate | zachte | zachte |
| same predicate | kookt | kookt |
| different predicate | kookt | traint |
| different predicate | traint | kookt |
| same predicate | traint | traint |
| same predicate | koopt | koopt |
| different predicate | koopt | krijgt |
| different predicate | krijgt | koopt |
| same predicate | krijgt | krijgt |
| same predicate | leuke | leuke |
| different predicate | leuke | magere |
| different predicate | magere | leuke |
| same predicate | magere | magere |
| same predicate | luistert | luistert |
| different predicate | luistert | zingt |
| different predicate | zingt | luistert |
| same predicate | zingt | zingt |
| same predicate | ontvangt | ontvangt |
| different predicate | ontvangt | verstuurt |
| different predicate | verstuurt | ontvangt |
| same predicate | verstuurt | verstuurt |
| same predicate | pakt | pakt |
| different predicate | pakt | ziet |
| different predicate | ziet | pakt |
| same predicate | ziet | ziet |
| same predicate | roze | roze |
| different predicate | roze | trage |
| different predicate | trage | roze |
| same predicate | trage | trage |
| same predicate | schrijft | schrijft |
| different predicate | schrijft | vermoordt |
| different predicate | vermoordt | schrijft |
| same predicate | vermoordt | vermoordt |
| same predicate | springt | springt |
| different predicate | springt | valt |
| different predicate | valt | springt |
| same predicate | valt | valt |
| same predicate | sterke | sterke |
| different predicate | sterke | zwakke |
| different predicate | zwakke | sterke |
| same predicate | zwakke | zwakke |
| same predicate | typt | typt |
| different predicate | typt | veroordeelt |
| different predicate | veroordeelt | typt |
| same predicate | veroordeelt | veroordeelt |
| same predicate | verbergt | verbergt |
| different predicate | verbergt | verstopt |
| different predicate | verstopt | verbergt |
| same predicate | verstopt | verstopt |
| same predicate | wandelt | wandelt |
| different predicate | wandelt | wint |
| different predicate | wint | wandelt |
| same predicate | wint | wint |

**Experimental details Experiment 2**

**Instructions**

- You will be reading pairs of phrases on the computer screen
- After reading both pairs, you have to judge on a scale how similar the phrases are
- You can do this by moving the scale to the left or to the right with the arrow keys on the keyboard
- Do this as quickly as possible, but also try to be accurate
- Try to use all of the scale and do not stay in the middle or on one end
- Use your intuition/first judgement to rate the phrases
- There will be eight blocks in total, you are allowed to take short break in between the blocks

**Stimuli Experiment 2**

*Table 2: example of one ‘very similar’ noun pair in all of the different conditions*

|  | Verb | Adjective |
| --- | --- | --- |
| Identity condition: predicate ‘very similar’ | List 1: ‘De vader eet’ vs. ‘De vader eet’  List 2: ‘De moeder drinkt’ vs. ‘De moeder drinkt’ | List 1: ‘De blauwe vader’ vs. ‘De blauwe vader’  List 2: ‘De rode moeder’ vs. ‘De rode moeder’ |
| Identity condition: predicate ‘similar’ | List 1: ‘De vader koopt’ vs. ‘De vader koopt’  List 2: ‘De moeder krijgt’ vs. ‘De moeder krijgt’ | List 1: ‘De teleurgestelde vader’ vs. ‘De teleurgestelde vader’  List 2: ‘De blije moeder’ vs. ‘De blije moeder’ |
| Identity condition: predicate ‘dissimilar’ | List 1: ‘De vader bereidt’ vs. ‘De vader bereidt’  List 2: ‘De moeder schildert’ vs. ‘De moeder schildert’ | List 1: ‘De luidruchtige vader’ vs. ‘De luidruchtige vader’  List 2: ‘De bruine moeder’ vs. ‘De bruine moeder’ |
| Identity condition: predicate ‘very dissimilar’ | List 1: ‘De vader typt’ vs. ‘De vader typt’  List 2: ‘De moeder veroordeelt’ vs. ‘De moeder veroordeelt’ | List 1: ‘De dramatische vader’ vs. ‘De dramatische vader’  List 2: ‘De enge moeder’ vs. ‘De enge moeder’ |
| Different predicates: predicate ‘very similar’ | List 1: ‘De vader eet’ vs. ‘De vader drinkt’  List 2: ‘De moeder drinkt’ vs. ‘De moeder eet’ | List 1: ‘De blauwe vader’ vs. ‘De rode vader’  List 2: ‘De rode moeder’ vs. ‘De blauwe moeder’ |
| Different predicates: predicate ‘similar’ | List 1: ‘De vader koopt’ vs. ‘De vader krijgt’  List 2: ‘De moeder krijgt’ vs. ‘De moeder koopt’ | List 1: ‘De teleurgestelde vader’ vs. ‘De blije vader’  List 2: ‘De blije moeder’ vs. ‘De teleurgestelde moeder’ |
| Different predicates: predicate ‘dissimilar’ | List 1: ‘De vader bereidt’ vs. ‘De vader schildert’  List 2: ‘De moeder schildert’ vs. ‘De moeder bereidt’ | List 1: ‘De luidruchtige vader’ vs. ‘De bruine vader’  List 2: ‘De bruine moeder’ vs. ‘De luidruchtige vader’ |
| Different predicates: predicate ‘very dissimilar’ | List 1: ‘De vader typt’ vs. ‘De vader veroordeelt’  List 2: ‘De moeder veroordeelt’ vs. ‘De moeder typt’ | List 1: ‘De dramatische vader’ vs. ‘De enge vader’  List 2: ‘De enge moeder’ vs. ‘De dramatische vader’ |
| Different subjects: predicate ‘very similar’ | List 1: ‘De vader eet’ vs. ‘De moeder eet’  List 2: ‘De moeder drinkt’ vs. ‘De vader drinkt’ | List 1: ‘De blauwe vader’ vs. ‘De blauwe moeder’  List 2: ‘De rode moeder’ vs. ‘De rode vader’ |
| Different subjects: predicate ‘similar’ | List 1: ‘De vader koopt’ vs. ‘De moeder koopt’  List 2: ‘De moeder krijgt’ vs. ‘De moeder krijgt’ | List 1: ‘De teleurgestelde vader’ vs. ‘De teleurgestelde moeder’  List 2: ‘De blije moeder’ vs. ‘De blije vader’ |
| Different subjects: predicate ‘dissimilar’ | List 1: ‘De vader bereidt’ vs. ‘De moeder bereidt’  List 2: ‘De moeder schildert’ vs. ‘De vader schildert’ | List 1: ‘De luidruchtige vader’ vs. ‘De luidruchtige moeder’  List 2: ‘De bruine moeder’ vs. ‘De bruine vader’ |
| Different subjects: predicate ‘very dissimilar’ | List 1: ‘De vader typt’ vs. ‘De moeder typt’  List 2: ‘De moeder veroordeelt’ vs. ‘De vader veroordeelt’ | List 1: ‘De dramatische vader’ vs. ‘De dramatische moeder’  List 2: ‘De enge moeder’ vs. ‘De enge vader’ |
| Both different: predicate ‘very similar’ | List 1: ‘De vader eet’ vs. ‘De moeder drinkt’  List 2: ‘De moeder drinkt’ vs. ‘De vader eet’ | List 1: ‘De blauwe vader’ vs. ‘De rode moeder’  List 2: ‘De rode moeder’ vs. ‘De blauwe vader’ |
| Both different: predicate ‘similar’ | List 1: ‘De vader koopt’ vs. ‘De moeder krijgt’  List 2: ‘De moeder krijgt’ vs. ‘De vader koopt’ | List 1: ‘De teleurgestelde vader’ vs. ‘De blije moeder’  List 2: ‘De blije moeder’ vs. ‘De teleurgestelde vader’ |
| Both different: predicate ‘dissimilar’ | List 1: ‘De vader bereidt’ vs. ‘De moeder schildert’  List 2: ‘De moeder schildert’ vs. ‘De vader bereidt’ | List 1: ‘De luidruchtige vader’ vs. ‘De bruine moeder’  List 2: ‘De bruine moeder’ vs. ‘De luidruchtige vader’ |
| Both different: predicate ‘very dissimilar’ | List 1: ‘De vader typt’ vs. ‘De moeder veroordeelt’  List 2: ‘De moeder veroordeelt’ vs. ‘De vader typt’ | List 1: ‘De dramatische vader’ vs. ‘De enge moeder’  List 2: ‘De enge moeder’ vs. ‘De dramatische vader’ |

**Complete list**

| PredicateType | AnswerType | Target | A |
| --- | --- | --- | --- |
| V | DiffPred | De/acrobaat/verstuurt | De/acrobaat/ontvangt |
| V | DiffPred | De/piraat/zit | De/piraat/bakt |
| V | DiffSubj | De/dirigent/verstuurt | De/brandweerman/verstuurt |
| V | Opposite | De/stalker/springt | De/crimineel/valt |
| V | DiffPred | De/dirigent/verstuurt | De/dirigent/ontvangt |
| A | Opposite | De/kwaadaardige/acteur | De/bedrieglijke/bezoeker |
| A | Identity | De/heldhaftige/redacteur | De/heldhaftige/redacteur |
| A | DiffPred | De/trage/moordenaar | De/roze/moordenaar |
| V | Opposite | De/acrobaat/fraudeert | De/goochelaar/sterft/ |
| A | DiffPred | De/kwaadaardige/acteur | De/bedrieglijke/acteur |
| V | Opposite | De/prins/zit | De/prinses/bakt |
| A | Opposite | De/groene/prins | De/gladde/prinses |
| A | Identity | De/leuke/slaaf | De/leuke/slaaf |
| A | Opposite | De/luidruchtige/leraar | De/bruine/verpleegster |
| V | Opposite | De/huisarts/bidt | De/chirurg/helpt |
| V | DiffPred | De/koning/luistert | De/koning/zingt |
| A | Opposite | De/dankbare/acrobaat | De/trouwe/goochelaar |
| A | Opposite | De/heldhaftige/huisarts | De/dappere/chirurg |
| V | DiffPred | De/jager/luistert | De/jager/zingt |
| A | DiffPred | De/teleurgestelde/minister | De/blije/minister |
| V | Opposite | De/monteur/kookt | De/agent/traint |
| A | Identity | De/vermoeide/piraat | De/vermoeide/piraat |
| V | DiffSubj | De/piraat/ziet | De/smid/ziet |
| A | Identity | Het/teleurgestelde/meisje | Het/teleurgestelde/meisje |
| V | Identity | De/acteur/betovert | De/acteur/betovert |
| A | Identity | De/luidruchtige/minister | De/luidruchtige/minister |
| A | DiffSubj | De/heldhaftige/stalker | De/heldhaftige/crimineel |
| A | Identity | Het/dramatische/meisje | Het/dramatische/meisje |
| V | DiffSubj | De/moordenaar/onderzoekt | De/activist/onderzoekt |
| V | Identity | De/acteur/geeft | De/acteur/geeft |
| V | DiffSubj | De/orthodontist/vermoordt | De/gijzelaar/vermoordt |
| A | Identity | De/paarse/moordenaar | De/paarse/moordenaar |
| V | Identity | De/acteur/brabbelt | De/acteur/brabbelt |
| A | Identity | Het/luidruchtige/meisje | Het/luidruchtige/meisje |
| A | Opposite | Het/drukke/kind | De/oranje/psycholoog |
| V | Identity | De/leraar/typt | De/leraar/typt |
| V | Identity | De/jager/betovert | De/jager/betovert |
| V | Identity | De/vader/koopt | De/vader/koopt |
| V | Identity | De/conducteur/luistert | De/conducteur/luistert |
| V | DiffSubj | De/conducteur/betovert | De/machinist/betovert |
| V | Opposite | De/prins/betreedt | De/prinses/verlaat |
| A | Identity | Het/drukke/kind | Het/drukke/kind |
| A | Identity | De/jonge/jager | De/jonge/jager |
| A | DiffPred | Het/fantastische/kind | Het/geweldige/kind |
| V | Opposite | De/stalker/gooit | De/crimineel/vangt |
| A | Opposite | De/dove/huisarts | De/knappe/chirurg |
| V | DiffPred | De/leraar/koopt | De/leraar/krijgt |
| A | Identity | De/teleurgestelde/minister | De/teleurgestelde/minister |
| V | Identity | De/stalker/danst | De/stalker/danst |
| A | DiffPred | Het/groene/kind | Het/gladde/kind |
| A | Opposite | De/drukke/slager | De/oranje/groenteman |
| V | DiffSubj | De/piraat/zit | De/smid/zit |
| V | Opposite | De/redacteur/gooit | De/schrijver/vangt |
| V | Identity | De/conducteur/geeft | De/conducteur/geeft |
| A | Identity | Het/blauwe/meisje | Het/blauwe/meisje |
| V | DiffPred | De/redacteur/danst | De/redacteur/valt/aan |
| V | Identity | De/redacteur/gooit | De/redacteur/gooit |
| A | Opposite | De/teleurgestelde/minister | De/blije/dief |
| V | DiffPred | De/redacteur/gooit | De/redacteur/vangt |
| V | Identity | De/leraar/eet | De/leraar/eet |
| V | DiffPred | De/slager/betreedt | De/slager/verlaat |
| A | Opposite | De/blauwe/minister | De/rode/dief |
| V | Identity | De/slager/betreedt | De/slager/betreedt |
| A | DiffPred | De/blauwe/leraar | De/rode/leraar |
| V | Opposite | De/acrobaat/kookt | De/goochelaar/traint |
| V | Identity | De/monteur/verdedigt | De/monteur/verdedigt |
| A | Opposite | De/zwakke/gitarist | De/sterke/zanger |
| V | Opposite | De/gitarist/onderzoekt | De/zanger/controleert |
| A | DiffPred | De/jonge/jager | De/zachte/jager |
| V | Opposite | De/slager/ziet | De/groenteman/pakt |
| V | DiffSubj | De/piraat/wandelt | De/smid/wandelt |
| V | Opposite | De/jager/luistert | De/kapper/zingt |
| V | Identity | De/prins/betreedt | De/prins/betreedt |
| V | Opposite | De/piraat/zit | De/smid/bakt |
| A | Opposite | De/dove/redacteur | De/knappe/schrijver |
| V | Identity | De/redacteur/danst | De/redacteur/danst |
| A | Identity | Het/vermoeide/kind | Het/vermoeide/kind |
| A | DiffSubj | De/verdrietige/jager | De/verdrietige/kapper |
| V | DiffPred | De/koning/brabbelt | De/koning/citeert |
| V | Identity | De/dirigent/verdedigt | De/dirigent/verdedigt |
| V | Identity | De/stalker/gooit | De/stalker/gooit |
| A | Identity | De/jonge/conducteur | De/jonge/conducteur |
| V | Identity | De/stalker/springt | De/stalker/springt |
| A | DiffPred | De/dramatische/vader | De/enge/vader |
| A | Opposite | De/glimmende/scholier | De/glanzende/student |
| V | Opposite | De/slaaf/fraudeert | De/meester/sterft |
| V | DiffPred | De/orthodontist/vermoordt | De/orthodontist/schrijft |
| V | Identity | De/dirigent/fraudeert | De/dirigent/fraudeert |
| A | DiffSubj | De/dankbare/acrobaat | De/dankbare/goochelaar |
| V | Identity | De/piraat/wandelt | De/piraat/wandelt |
| V | DiffSubj | De/monteur/fraudeert | De/agent/fraudeert |
| A | DiffPred | Het/teleurgestelde/meisje | Het/blije/meisje |
| A | Identity | De/kwaadaardige/jager | De/kwaadaardige/jager |
| V | DiffSubj | De/acteur/brabbelt | De/bezoeker/brabbelt |
| A | Opposite | De/trage/moordenaar | De/roze/activist |
| A | DiffPred | De/dankbare/acrobaat | De/trouwe/acrobaat |
| A | Identity | De/luidruchtige/vader | De/luidruchtige/vader |
| V | DiffSubj | De/minister/bereidt | De/dief/bereidt |
| A | DiffSubj | De/luidruchtige/minister | De/luidruchtige/dief |
| V | Identity | De/orthodontist/vermoordt | De/orthodontist/vermoordt |
| V | Identity | De/orthodontist/onderzoekt | De/orthodontist/onderzoekt |
| A | Opposite | De/matige/monteur | De/geschikte/agent |
| V | Identity | De/slager/wandelt | De/slager/wandelt |
| V | Identity | De/leraar/bereidt | De/leraar/bereidt |
| V | Opposite | De/conducteur/brabbelt | De/machinist/citeert |
| V | DiffPred | De/moordenaar/verstopt | De/moordenaar/verbergt |
| A | Opposite | De/vermoeide/prins | De/energieke/prinses |
| V | DiffSubj | De/conducteur/brabbelt | De/machinist/brabbelt |
| A | DiffPred | De/matige/monteur | De/geschikte/monteur |
| A | DiffSubj | De/dankbare/dirigent | De/dankbare/brandweerman |
| V | DiffPred | De/monteur/verstuurt | De/monteur/ontvangt |
| V | Identity | De/vader/typt | De/vader/typt |
| A | Identity | De/trage/gitarist | De/trage/gitarist |
| A | DiffSubj | De/dove/huisarts | De/dove/chirurg |
| A | DiffPred | De/matige/slaaf | De/geschikte/slaaf |
| V | DiffSubj | Het/kind/ziet | De/psycholoog/ziet |
| V | DiffSubj | De/jager/luistert | De/kapper/luistert |
| V | DiffPred | De/gitarist/vermoordt | De/gitarist/schrijft |
| A | DiffPred | De/depressieve/acrobaat | De/sombere/acrobaat |
| V | DiffSubj | De/orthodontist/wijst/af | De/gijzelaar/wijst/af |
| V | Opposite | De/scholier/verstopt | De/student/verbergt |
| A | Opposite | De/harde/redacteur | De/ruwe/schrijver |
| V | DiffSubj | De/gitarist/verstopt | De/zanger/verstopt |
| A | Identity | De/teleurgestelde/vader | De/teleurgestelde/vader |
| V | Opposite | De/redacteur/springt | De/schrijver/valt |
| A | DiffSubj | De/dankbare/slaaf | De/dankbare/meester |
| V | Opposite | De/scholier/onderzoekt | De/student/controleert |
| A | Opposite | De/verdrietige/koning | De/boze/hertog |
| V | Identity | De/orthodontist/wijst/af | De/orthodontist/wijst/af |
| A | DiffPred | De/groene/prins | De/gladde/prins |
| A | Opposite | De/trage/scholier | De/roze/student |
| V | DiffSubj | Het/meisje/eet | De/jongen/eet |
| A | DiffSubj | De/drukke/slager | De/drukke/groenteman |
| V | Identity | De/gitarist/wijst/af | De/gitarist/wijst/af |
| V | DiffPred | Het/slachtoffer/bidt | Het/slachtoffer/helpt |
| V | DiffPred | De/koning/geeft | De/koning/besproeit |
| A | DiffSubj | De/kwaadaardige/koning | De/kwaadaardige/hertog |
| A | Opposite | De/nieuwe/acteur | De/doffe/bezoeker |
| V | DiffSubj | De/huisarts/danst | De/chirurg/danst |
| A | Identity | De/dankbare/dirigent | De/dankbare/dirigent |
| A | Opposite | Het/luidruchtige/meisje | De/bruine/jongen |
| V | DiffSubj | De/dirigent/kookt | De/brandweerman/kookt |
| A | DiffPred | De/vermoeide/slager | De/energieke/slager |
| V | Opposite | De/leraar/typt | De/verpleegster/veroordeelt |
| A | DiffPred | De/botte/redacteur | De/onbeleefde/redacteur |
| A | DiffSubj | De/drukke/prins | De/drukke/prinses |
| V | Opposite | De/koning/brabbelt | De/hertog/citeert |
| A | Identity | De/verdrietige/acteur | De/verdrietige/acteur |
| V | DiffPred | De/koning/betovert | De/koning/hypnotiseert |
| V | DiffPred | De/prins/wandelt | De/prins/wint |
| A | DiffPred | De/zwakke/gitarist | De/sterke/gitarist |
| A | Opposite | De/harde/huisarts | De/ruwe/chirurg |
| V | DiffPred | De/gitarist/wijst/af | De/gitarist/fluit |
| V | Identity | Het/meisje/koopt | Het/meisje/koopt |
| A | Opposite | De/teleurgestelde/vader | De/blije/moeder |
| V | DiffSubj | De/scholier/verstopt | De/student/verstopt |
| A | DiffSubj | De/groene/piraat | De/groene/smid |
| A | DiffPred | De/glimmende/scholier | De/glanzende/scholier |
| A | Opposite | De/vermoeide/piraat | De/energieke/smid |
| A | Opposite | De/verdrietige/jager | De/boze/kapper |
| A | Identity | De/leuke/dirigent | De/leuke/dirigent |
| A | DiffPred | Het/heldhaftige/slachtoffer | Het/dappere/slachtoffer |
| V | DiffPred | De/scholier/verstopt | De/scholier/verbergt |
| V | Opposite | De/leraar/eet | De/verpleegster/drinkt |
| A | DiffPred | De/harde/huisarts | De/ruwe/huisarts |
| A | Identity | De/blauwe/vader | De/blauwe/vader |
| A | DiffPred | De/paarse/moordenaar | De/glinsterende/moordenaar |
| A | DiffSubj | De/paarse/moordenaar | De/paarse/activist |
| V | DiffPred | De/redacteur/bidt | De/redacteur/helpt |
| A | Opposite | De/zwakke/moordenaar | De/sterke/activist |
| A | Identity | De/nieuwe/conducteur | De/nieuwe/conducteur |
| A | DiffSubj | De/zwakke/orthodontist | De/zwakke/gijzelaar |
| V | DiffSubj | De/scholier/onderzoekt | De/student/onderzoekt |
| V | DiffPred | De/huisarts/springt | De/huisarts/valt |
| V | Identity | Het/kind/ziet | Het/kind/ziet |
| A | DiffSubj | De/luidruchtige/leraar | De/luidruchtige/verpleegster |
| V | DiffSubj | De/acrobaat/verdedigt | De/goochelaar/verdedigt |
| A | Identity | De/matige/acrobaat | De/matige/acrobaat |
| A | Identity | De/paarse/orthodontist | De/paarse/orthodontist |
| V | DiffPred | Het/kind/wandelt | Het/kind/wint |
| V | Opposite | De/acteur/brabbelt | De/bezoeker/citeert |
| V | DiffSubj | Het/meisje/bereidt | De/jongen/bereidt |
| A | Opposite | De/zwakke/scholier | De/sterke/student |
| A | Opposite | De/kwaadaardige/jager | De/bedrieglijke/kapper |
| A | Identity | De/jonge/koning | De/jonge/koning |
| V | DiffPred | De/slager/wandelt | De/slager/wint |
| A | Identity | De/glimmende/moordenaar | De/glimmende/moordenaar |
| V | DiffSubj | De/conducteur/geeft | De/machinist/geeft |
| A | Opposite | De/paarse/gitarist | De/glinsterende/zanger |
| A | DiffPred | De/leuke/acrobaat | De/magere/acrobaat |
| V | DiffSubj | De/dirigent/verdedigt | De/brandweerman/verdedigt |
| V | Identity | De/scholier/verstopt | De/scholier/verstopt |
| V | DiffPred | De/jager/betovert | De/jager/hypnotiseert |
| A | DiffPred | De/trage/gitarist | De/roze/gitarist |
| A | DiffPred | De/leuke/dirigent | De/magere/dirigent |
| A | DiffPred | Het/vermoeide/kind | Het/energieke/kind |
| V | Identity | Het/kind/zit | Het/kind/zit |
| V | Identity | Het/meisje/typt | Het/meisje/typt |
| A | Identity | De/blauwe/minister | De/blauwe/minister |
| A | DiffPred | De/groene/piraat | De/gladde/piraat |
| V | Opposite | De/orthodontist/vermoordt | De/gijzelaar/schrijft |
| V | Identity | De/jager/brabbelt | De/jager/brabbelt |
| V | DiffSubj | De/conducteur/luistert | De/machinist/luistert |
| V | DiffPred | De/piraat/ziet | De/piraat/pakt |
| V | Identity | De/huisarts/bidt | De/huisarts/bidt |
| A | DiffSubj | De/zwakke/gitarist | De/zwakke/zanger |
| A | DiffPred | De/kwaadaardige/koning | De/bedrieglijke/koning |
| V | DiffPred | De/vader/koopt | De/vader/krijgt |
| V | DiffPred | Het/kind/ziet | Het/kind/pakt |
| V | DiffPred | De/moordenaar/wijst/af | De/moordenaar/fluit |
| V | DiffPred | De/slager/ziet | De/slager/pakt |
| A | DiffSubj | De/trage/scholier | De/trage/student |
| A | DiffSubj | De/fantastische/slager | De/fantastische/groenteman |
| A | DiffPred | De/drukke/piraat | De/oranje/piraat |
| A | Identity | De/heldhaftige/huisarts | De/heldhaftige/huisarts |
| V | DiffPred | De/jager/brabbelt | De/jager/citeert |
| V | Opposite | De/vader/koopt | De/moeder/krijgt |
| V | Identity | De/dirigent/kookt | De/dirigent/kookt |
| V | DiffSubj | De/vader/bereidt | De/moeder/bereidt |
| V | DiffSubj | De/monteur/verstuurt | De/agent/verstuurt |
| V | Opposite | De/leraar/koopt | De/verpleegster/krijgt |
| V | Opposite | De/prins/ziet | De/prinses/pakt |
| A | Identity | De/dankbare/slaaf | De/dankbare/slaaf |
| V | DiffPred | Het/slachtoffer/springt | Het/slachtoffer/valt |
| A | DiffSubj | De/fantastische/prins | De/fantastische/prinses |
| A | DiffPred | Het/dove/slachtoffer | Het/knappe/slachtoffer |
| V | Identity | De/vader/bereidt | De/vader/bereidt |
| V | Opposite | De/gitarist/vermoordt | De/zanger/schrijft |
| V | Opposite | De/moordenaar/verstopt | De/activist/verbergt |
| A | Opposite | De/glimmende/moordenaar | De/glanzende/activist |
| A | DiffSubj | Het/heldhaftige/slachtoffer | De/heldhaftige/inspecteur |
| A | DiffPred | De/luidruchtige/leraar | De/bruine/leraar |
| A | DiffPred | De/heldhaftige/stalker | De/dappere/stalker |
| V | Identity | De/piraat/zit | De/piraat/zit |
| V | DiffPred | De/monteur/verdedigt | De/monteur/beschermt |
| V | DiffSubj | Het/slachtoffer/springt | De/inspecteur/springt |
| V | Opposite | Het/meisje/bereidt | De/jongen/schildert |
| A | Opposite | De/dove/stalker | De/knappe/crimineel |
| V | DiffPred | De/orthodontist/verstopt | De/orthodontist/verbergt |
| A | DiffSubj | De/fantastische/piraat | De/fantastische/smid |
| V | Opposite | De/stalker/bidt | De/crimineel/helpt |
| A | DiffPred | De/paarse/scholier | De/glinsterende/scholier |
| A | DiffPred | De/harde/stalker | De/ruwe/stalker |
| A | DiffPred | De/matige/dirigent | De/geschikte/dirigent |
| V | Identity | De/redacteur/springt | De/redacteur/springt |
| A | DiffSubj | De/blauwe/vader | De/blauwe/moeder |
| A | DiffPred | De/drukke/prins | De/oranje/prins |
| V | Opposite | De/vader/typt | De/moeder/veroordeelt |
| A | DiffSubj | Het/fantastische/kind | De/fantastische/psycholoog |
| A | DiffSubj | De/kwaadaardige/jager | De/kwaadaardige/kapper |
| V | Opposite | De/leraar/bereidt | De/verpleegster/schildert |
| V | DiffPred | De/vader/eet | De/vader/drinkt |
| V | Opposite | De/slaaf/verstuurt | De/meester/ontvangt |
| V | Identity | Het/kind/wandelt | Het/kind/wandelt |
| V | DiffPred | De/slager/zit | De/slager/bakt |
| V | DiffSubj | De/moordenaar/wijst/af | De/activist/wijst/af |
| A | DiffPred | De/heldhaftige/redacteur | De/dappere/redacteur |
| A | Opposite | De/drukke/piraat | De/oranje/smid |
| V | DiffPred | Het/meisje/bereidt | Het/meisje/schildert |
| V | DiffSubj | De/monteur/verdedigt | De/agent/verdedigt |
| V | Opposite | Het/slachtoffer/danst | De/inspecteur/valt/aan |
| V | Identity | De/prins/zit | De/prins/zit |
| A | Opposite | De/matige/slaaf | De/geschikte/meester |
| A | Opposite | Het/dramatische/meisje | De/enge/jongen |
| V | DiffPred | De/scholier/onderzoekt | De/scholier/controleert |
| A | DiffPred | De/leuke/slaaf | De/magere/slaaf |
| A | Opposite | De/glimmende/gitarist | De/glanzende/zanger |
| V | DiffSubj | De/leraar/bereidt | De/verpleegster/bereidt |
| V | DiffPred | De/dirigent/verdedigt | De/dirigent/beschermt |
| A | Opposite | De/dankbare/dirigent | De/trouwe/brandweerman |
| A | Opposite | De/depressieve/acrobaat | De/sombere/goochelaar |
| A | DiffSubj | De/glimmende/moordenaar | De/glimmende/activist |
| V | Identity | De/acrobaat/verdedigt | De/acrobaat/verdedigt |
| A | DiffSubj | De/teleurgestelde/minister | De/teleurgestelde/dief |
| V | DiffPred | De/slaaf/fraudeert | De/slaaf/sterft |
| V | Identity | Het/meisje/eet | Het/meisje/eet |
| A | Opposite | De/dankbare/monteur | De/trouwe/agent |
| V | DiffPred | De/prins/zit | De/prins/bakt |
| A | Opposite | Het/heldhaftige/slachtoffer | De/dappere/inspecteur |
| V | DiffPred | De/huisarts/danst | De/huisarts/valt/aan |
| A | DiffSubj | De/groene/slager | De/groene/groenteman |
| A | DiffSubj | De/botte/redacteur | De/botte/schrijver |
| V | DiffSubj | Het/slachtoffer/danst | De/inspecteur/danst |
| V | Opposite | De/slaaf/kookt | De/meester/traint |
| A | DiffPred | De/glimmende/moordenaar | De/glanzende/moordenaar |
| A | DiffSubj | De/dramatische/minister | De/dramatische/dief |
| A | DiffSubj | De/vermoeide/piraat | De/vermoeide/smid |
| A | DiffPred | De/paarse/gitarist | De/glinsterende/gitarist |
| V | Opposite | De/conducteur/betovert | De/machinist/hypnotiseert |
| V | DiffPred | De/stalker/gooit | De/stalker/vangt |
| V | DiffSubj | De/gitarist/vermoordt | De/zanger/vermoordt |
| V | DiffSubj | Het/meisje/koopt | De/jongen/koopt |
| V | DiffPred | De/acrobaat/verdedigt | De/acrobaat/beschermt |
| V | Opposite | De/scholier/vermoordt | De/student/schrijft |
| V | DiffPred | De/conducteur/brabbelt | De/conducteur/citeert |
| A | Identity | De/glimmende/gitarist | De/glimmende/gitarist |
| V | Opposite | De/dirigent/fraudeert | De/brandweerman/sterft |
| A | DiffSubj | De/leuke/monteur | De/leuke/agent |
| V | DiffSubj | De/stalker/danst | De/crimineel/danst |
| V | DiffPred | De/scholier/wijst/af | De/scholier/fluit |
| A | Opposite | De/heldhaftige/stalker | De/dappere/crimineel |
| A | Identity | De/nieuwe/jager | De/nieuwe/jager |
| A | DiffSubj | De/dove/redacteur | De/dove/schrijver |
| A | DiffPred | De/kwaadaardige/jager | De/bedrieglijke/jager |
| A | DiffSubj | Het/botte/slachtoffer | De/botte/inspecteur |
| A | DiffSubj | De/harde/huisarts | De/harde/chirurg |
| V | DiffPred | De/gitarist/onderzoekt | De/gitarist/controleert |
| A | Opposite | Het/fantastische/kind | De/geweldige/psycholoog |
| V | DiffPred | De/minister/koopt | De/minister/krijgt |
| V | Identity | De/prins/ziet | De/prins/ziet |
| V | Identity | Het/slachtoffer/bidt | Het/slachtoffer/bidt |
| V | DiffSubj | De/orthodontist/onderzoekt | De/gijzelaar/onderzoekt |
| A | Identity | De/harde/stalker | De/harde/stalker |
| A | DiffPred | De/verdrietige/conducteur | De/boze/conducteur |
| V | DiffSubj | De/slaaf/fraudeert | De/meester/fraudeert |
| A | DiffPred | De/drukke/slager | De/oranje/slager |
| V | Opposite | De/acteur/geeft | De/bezoeker/besproeit |
| V | DiffPred | Het/slachtoffer/danst | Het/slachtoffer/valt/aan |
| V | DiffSubj | De/minister/koopt | De/dief/koopt |
| A | DiffSubj | Het/drukke/kind | De/drukke/psycholoog |
| V | Opposite | De/monteur/verdedigt | De/agent/beschermt |
| V | DiffSubj | De/orthodontist/verstopt | De/gijzelaar/verstopt |
| A | Identity | De/zwakke/scholier | De/zwakke/scholier |
| A | Identity | De/groene/slager | De/groene/slager |
| A | DiffSubj | De/drukke/piraat | De/drukke/smid |
| V | Identity | De/leraar/koopt | De/leraar/koopt |
| A | DiffSubj | De/heldhaftige/huisarts | De/heldhaftige/chirurg |
| A | Identity | De/dove/stalker | De/dove/stalker |
| V | DiffSubj | De/leraar/typt | De/verpleegster/typt |
| A | Identity | De/depressieve/monteur | De/depressieve/monteur |
| V | Identity | De/moordenaar/verstopt | De/moordenaar/verstopt |
| A | DiffPred | De/matige/acrobaat | De/geschikte/acrobaat |
| V | DiffSubj | De/acteur/betovert | De/bezoeker/betovert |
| V | Identity | De/dirigent/verstuurt | De/dirigent/verstuurt |
| A | DiffPred | De/dankbare/slaaf | De/trouwe/slaaf |
| V | Opposite | De/slager/wandelt | De/groenteman/wint |
| A | DiffPred | De/heldhaftige/huisarts | De/dappere/huisarts |
| V | Identity | De/jager/luistert | De/jager/luistert |
| V | Opposite | De/jager/brabbelt | De/kapper/citeert |
| V | Opposite | Het/kind/wandelt | De/psycholoog/wint |
| A | Identity | De/glimmende/orthodontist | De/glimmende/orthodontist |
| V | Opposite | De/gitarist/verstopt | De/zanger/verbergt |
| V | DiffPred | De/leraar/bereidt | De/leraar/schildert |
| V | Opposite | De/huisarts/springt | De/chirurg/valt |
| V | DiffPred | De/minister/typt | De/minister/veroordeelt |
| V | DiffSubj | De/acrobaat/kookt | De/goochelaar/kookt |
| A | Identity | De/zwakke/gitarist | De/zwakke/gitarist |
| A | Identity | De/drukke/slager | De/drukke/slager |
| A | DiffPred | De/verdrietige/jager | De/boze/jager |
| V | DiffSubj | De/redacteur/danst | De/schrijver/danst |
| A | Opposite | De/fantastische/prins | De/geweldige/prinses |
| A | Identity | De/dramatische/vader | De/dramatische/vader |
| A | Opposite | De/harde/stalker | De/ruwe/crimineel |
| A | Opposite | De/matige/acrobaat | De/geschikte/goochelaar |
| V | Identity | De/koning/luistert | De/koning/luistert |
| A | DiffSubj | De/vermoeide/slager | De/vermoeide/groenteman |
| V | DiffPred | De/acteur/brabbelt | De/acteur/citeert |
| A | DiffSubj | De/nieuwe/acteur | De/nieuwe/bezoeker |
| A | Opposite | De/verdrietige/acteur | De/boze/bezoeker |
| A | Opposite | De/blauwe/leraar | De/rode/verpleegster |
| V | Identity | De/vader/eet | De/vader/eet |
| V | DiffPred | De/leraar/typt | De/leraar/veroordeelt |
| A | Opposite | De/jonge/conducteur | De/zachte/machinist |
| A | DiffSubj | Het/teleurgestelde/meisje | De/teleurgestelde/jongen |
| A | DiffPred | De/harde/redacteur | De/ruwe/redacteur |
| A | DiffPred | De/dramatische/minister | De/enge/minister |
| V | DiffSubj | De/dirigent/fraudeert | De/brandweerman/fraudeert |
| V | Opposite | De/slager/zit | De/groenteman/bakt |
| V | DiffSubj | De/huisarts/springt | De/chirurg/springt |
| A | Opposite | De/fantastische/slager | De/geweldige/groenteman |
| A | DiffPred | De/trage/orthodontist | De/roze/orthodontist |
| A | Opposite | De/nieuwe/conducteur | De/doffe/machinist |
| A | DiffPred | De/fantastische/prins | De/geweldige/prins |
| A | Opposite | De/paarse/scholier | De/glinsterende/student |
| V | DiffPred | De/piraat/wandelt | De/piraat/wint |
| V | Identity | De/gitarist/vermoordt | De/gitarist/vermoordt |
| V | Identity | De/slager/ziet | De/slager/ziet |
| A | DiffSubj | De/depressieve/monteur | De/depressieve/agent |
| V | DiffPred | De/moordenaar/vermoordt | De/moordenaar/schrijft |
| A | Opposite | De/groene/piraat | De/gladde/smid |
| V | Identity | De/slaaf/kookt | De/slaaf/kookt |
| V | DiffPred | De/monteur/kookt | De/monteur/traint |
| V | Identity | De/gitarist/verstopt | De/gitarist/verstopt |
| A | Identity | De/dankbare/monteur | De/dankbare/monteur |
| A | Opposite | De/drukke/prins | De/oranje/prinses |
| A | Opposite | De/depressieve/dirigent | De/sombere/brandweerman |
| A | DiffSubj | De/harde/redacteur | De/harde/schrijver |
| A | Identity | De/botte/huisarts | De/botte/huisarts |
| A | DiffPred | De/paarse/orthodontist | De/glinsterende/orthodontist |
| A | DiffSubj | De/leuke/slaaf | De/leuke/meester |
| V | Identity | Het/slachtoffer/springt | Het/slachtoffer/springt |
| V | Opposite | De/stalker/danst | De/crimineel/valt/aan |
| A | DiffSubj | De/vermoeide/prins | De/vermoeide/prinses |
| A | DiffPred | De/zwakke/scholier | De/sterke/scholier |
| V | DiffPred | Het/meisje/eet | Het/meisje/drinkt |
| A | Identity | Het/heldhaftige/slachtoffer | Het/heldhaftige/slachtoffer |
| V | Identity | De/koning/betovert | De/koning/betovert |
| A | Identity | De/leuke/acrobaat | De/leuke/acrobaat |
| V | Opposite | De/prins/wandelt | De/prinses/wint |
| A | DiffSubj | De/blauwe/minister | De/blauwe/dief |
| A | DiffSubj | De/jonge/conducteur | De/jonge/machinist |
| A | Identity | De/dramatische/leraar | De/dramatische/leraar |
| V | Opposite | De/monteur/fraudeert | De/agent/sterft |
| A | DiffSubj | De/leuke/dirigent | De/leuke/brandweerman |
| A | Identity | De/dramatische/minister | De/dramatische/minister |
| A | Opposite | De/botte/stalker | De/onbeleefde/crimineel |
| V | DiffPred | De/prins/betreedt | De/prins/verlaat |
| V | Opposite | De/piraat/betreedt | De/smid/verlaat |
| V | DiffSubj | De/vader/koopt | De/moeder/koopt |
| A | DiffSubj | De/zwakke/moordenaar | De/zwakke/activist |
| V | DiffPred | De/scholier/vermoordt | De/scholier/schrijft |
| A | Identity | De/kwaadaardige/conducteur | De/kwaadaardige/conducteur |
| V | DiffPred | De/conducteur/luistert | De/conducteur/zingt |
| A | Identity | De/teleurgestelde/leraar | De/teleurgestelde/leraar |
| A | Identity | De/paarse/scholier | De/paarse/scholier |
| V | Identity | De/acrobaat/kookt | De/acrobaat/kookt |
| A | DiffSubj | Het/harde/slachtoffer | De/harde/inspecteur |
| A | Identity | De/vermoeide/prins | De/vermoeide/prins |
| V | Opposite | Het/meisje/typt | De/jongen/veroordeelt |
| V | Identity | De/conducteur/betovert | De/conducteur/betovert |
| A | Identity | De/trage/moordenaar | De/trage/moordenaar |
| A | DiffSubj | De/heldhaftige/redacteur | De/heldhaftige/schrijver |
| V | Identity | De/jager/geeft | De/jager/geeft |
| V | DiffPred | De/gitarist/verstopt | De/gitarist/verbergt |
| A | DiffPred | De/nieuwe/jager | De/doffe/jager |
| V | Opposite | De/acteur/luistert | De/bezoeker/zingt |
| A | Identity | Het/groene/kind | Het/groene/kind |
| V | DiffSubj | De/stalker/gooit | De/crimineel/gooit |
| V | DiffSubj | De/gitarist/wijst/af | De/zanger/wijst/af |
| V | DiffSubj | De/redacteur/bidt | De/schrijver/bidt |
| V | DiffPred | De/acteur/geeft | De/acteur/besproeit |
| V | DiffSubj | De/acrobaat/verstuurt | De/goochelaar/verstuurt |
| A | DiffSubj | De/botte/huisarts | De/botte/chirurg |
| V | DiffPred | De/vader/bereidt | De/vader/schildert |
| V | Opposite | Het/kind/zit | De/psycholoog/bakt |
| A | DiffSubj | De/paarse/scholier | De/paarse/student |
| V | Opposite | De/acrobaat/verstuurt | De/goochelaar/ontvangt |
| A | DiffSubj | Het/dove/slachtoffer | De/dove/inspecteur |
| A | Identity | Het/botte/slachtoffer | Het/botte/slachtoffer |
| V | Opposite | Het/meisje/eet | De/jongen/drinkt |
| A | Identity | De/zwakke/orthodontist | De/zwakke/orthodontist |
| A | Identity | De/drukke/prins | De/drukke/prins |
| A | DiffSubj | De/verdrietige/conducteur | De/verdrietige/machinist |
| A | DiffPred | De/trage/scholier | De/roze/scholier |
| A | DiffPred | De/leuke/monteur | De/magere/monteur |
| A | Identity | De/matige/monteur | De/matige/monteur |
| A | Identity | De/fantastische/slager | De/fantastische/slager |
| A | Opposite | De/dramatische/leraar | De/enge/verpleegster |
| V | Opposite | De/dirigent/verstuurt | De/brandweerman/ontvangt |
| V | DiffSubj | De/stalker/springt | De/crimineel/springt |
| A | DiffSubj | De/glimmende/scholier | De/glimmende/student |
| A | DiffPred | De/dankbare/dirigent | De/trouwe/dirigent |
| A | DiffSubj | De/zwakke/scholier | De/zwakke/student |
| A | Identity | De/blauwe/leraar | De/blauwe/leraar |
| V | DiffSubj | De/jager/geeft | De/kapper/geeft |
| V | Identity | De/conducteur/brabbelt | De/conducteur/brabbelt |
| A | Identity | De/harde/redacteur | De/harde/redacteur |
| V | Opposite | De/jager/betovert | De/kapper/hypnotiseert |
| V | DiffPred | De/slaaf/verstuurt | De/slaaf/ontvangt |
| V | DiffSubj | Het/slachtoffer/bidt | De/inspecteur/bidt |
| V | DiffSubj | De/koning/betovert | De/hertog/betovert |
| V | Identity | Het/slachtoffer/danst | Het/slachtoffer/danst |
| V | Opposite | De/piraat/wandelt | De/smid/wint |
| V | DiffSubj | De/acrobaat/fraudeert | De/goochelaar/fraudeert |
| A | Identity | De/trage/orthodontist | De/trage/orthodontist |
| A | Opposite | De/dramatische/vader | De/enge/moeder |
| A | DiffSubj | De/depressieve/slaaf | De/depressieve/meester |
| V | DiffPred | De/monteur/fraudeert | De/monteur/sterft |
| A | Opposite | Het/dove/slachtoffer | De/knappe/inspecteur |
| V | DiffSubj | Het/kind/zit | De/psycholoog/zit |
| V | Identity | De/minister/typt | De/minister/typt |
| V | DiffSubj | De/stalker/bidt | De/crimineel/bidt |
| V | DiffSubj | De/redacteur/gooit | De/schrijver/gooit |
| V | DiffSubj | De/slager/wandelt | De/groenteman/wandelt |
| A | DiffSubj | De/paarse/orthodontist | De/paarse/gijzelaar |
| V | DiffPred | De/moordenaar/onderzoekt | De/moordenaar/controleert |
| A | DiffPred | De/jonge/conducteur | De/zachte/conducteur |
| A | DiffSubj | De/depressieve/acrobaat | De/depressieve/goochelaar |
| A | DiffPred | De/jonge/koning | De/zachte/koning |
| V | Opposite | Het/slachtoffer/springt | De/inspecteur/valt |
| V | Identity | De/stalker/bidt | De/stalker/bidt |
| A | DiffPred | De/blauwe/minister | De/rode/minister |
| V | Opposite | De/huisarts/danst | De/chirurg/valt/aan |
| A | DiffPred | De/teleurgestelde/leraar | De/blije/leraar |
| V | DiffPred | De/stalker/springt | De/stalker/valt |
| A | Opposite | Het/harde/slachtoffer | De/ruwe/inspecteur |
| V | DiffPred | De/stalker/danst | De/stalker/valt/aan |
| A | DiffPred | De/glimmende/orthodontist | De/glanzende/orthodontist |
| A | DiffSubj | De/glimmende/gitarist | De/glimmende/zanger |
| V | Opposite | De/minister/koopt | De/dief/krijgt |
| V | Identity | De/orthodontist/verstopt | De/orthodontist/verstopt |
| V | Identity | De/acteur/luistert | De/acteur/luistert |
| V | DiffSubj | Het/slachtoffer/gooit | De/inspecteur/gooit |
| V | DiffSubj | De/koning/geeft | De/hertog/geeft |
| A | DiffPred | De/nieuwe/acteur | De/doffe/acteur |
| A | DiffSubj | De/matige/monteur | De/matige/agent |
| V | Opposite | De/acteur/betovert | De/bezoeker/hypnotiseert |
| A | DiffPred | Het/luidruchtige/meisje | Het/bruine/meisje |
| A | Opposite | De/botte/redacteur | De/onbeleefde/schrijver |
| A | DiffPred | De/verdrietige/koning | De/boze/koning |
| A | Opposite | De/leuke/slaaf | De/magere/meester |
| V | Identity | De/gitarist/onderzoekt | De/gitarist/onderzoekt |
| V | Opposite | De/slager/betreedt | De/groenteman/verlaat |
| V | DiffPred | De/orthodontist/wijst/af | De/orthodontist/fluit |
| V | Opposite | De/dirigent/kookt | De/brandweerman/traint |
| A | DiffSubj | De/teleurgestelde/leraar | De/teleurgestelde/verpleegster |
| A | Opposite | De/jonge/jager | De/zachte/kapper |
| A | Opposite | De/depressieve/slaaf | De/sombere/meester |
| A | Identity | De/kwaadaardige/acteur | De/kwaadaardige/acteur |
| V | Identity | De/monteur/verstuurt | De/monteur/verstuurt |
| A | DiffPred | Het/harde/slachtoffer | Het/ruwe/slachtoffer |
| V | DiffSubj | De/huisarts/bidt | De/chirurg/bidt |
| A | Opposite | Het/groene/kind | De/gladde/psycholoog |
| V | Identity | De/koning/geeft | De/koning/geeft |
| A | Identity | De/dove/redacteur | De/dove/redacteur |
| V | Opposite | De/scholier/wijst/af | De/student/fluit |
| V | Opposite | De/conducteur/geeft | De/machinist/besproeit |
| V | DiffSubj | De/vader/eet | De/moeder/eet |
| A | Identity | De/trage/scholier | De/trage/scholier |
| V | Identity | De/piraat/betreedt | De/piraat/betreedt |
| A | Opposite | De/leuke/dirigent | De/magere/brandweerman |
| V | Identity | De/monteur/kookt | De/monteur/kookt |
| V | DiffSubj | De/koning/luistert | De/hertog/luistert |
| V | DiffPred | De/piraat/betreedt | De/piraat/verlaat |
| A | DiffPred | De/nieuwe/koning | De/doffe/koning |
| V | Opposite | De/gitarist/wijst/af | De/zanger/fluit |
| V | Identity | De/moordenaar/wijst/af | De/moordenaar/wijst/af |
| V | DiffSubj | De/leraar/eet | De/verpleegster/eet |
| A | Identity | De/depressieve/acrobaat | De/depressieve/acrobaat |
| A | Opposite | De/botte/huisarts | De/onbeleefde/chirurg |
| V | DiffPred | Het/kind/zit | Het/kind/bakt |
| V | Identity | De/scholier/wijst/af | De/scholier/wijst/af |
| A | Identity | De/botte/redacteur | De/botte/redacteur |
| A | Identity | De/kwaadaardige/koning | De/kwaadaardige/koning |
| V | DiffPred | De/jager/geeft | De/jager/besproeit |
| V | DiffPred | De/acrobaat/fraudeert | De/acrobaat/sterft |
| A | Opposite | De/luidruchtige/vader | De/bruine/moeder |
| A | DiffSubj | De/dramatische/vader | De/dramatische/moeder |
| A | DiffPred | De/groene/slager | De/gladde/slager |
| A | DiffSubj | De/trage/gitarist | De/trage/zanger |
| V | Opposite | De/orthodontist/verstopt | De/gijzelaar/verbergt |
| V | DiffPred | De/dirigent/kookt | De/dirigent/traint |
| A | DiffSubj | De/matige/dirigent | De/matige/brandweerman |
| A | Opposite | De/jonge/koning | De/zachte/hertog |
| A | Identity | De/dankbare/acrobaat | De/dankbare/acrobaat |
| V | Identity | De/slaaf/verstuurt | De/slaaf/verstuurt |
| A | Identity | De/vermoeide/slager | De/vermoeide/slager |
| A | Opposite | De/zwakke/orthodontist | De/sterke/gijzelaar |
| A | DiffPred | De/dankbare/monteur | De/trouwe/monteur |
| V | Identity | De/piraat/ziet | De/piraat/ziet |
| V | Identity | De/huisarts/springt | De/huisarts/springt |
| A | DiffPred | De/depressieve/slaaf | De/sombere/slaaf |
| A | Identity | De/fantastische/piraat | De/fantastische/piraat |
| A | DiffPred | Het/botte/slachtoffer | Het/onbeleefde/slachtoffer |
| A | DiffPred | De/nieuwe/conducteur | De/doffe/conducteur |
| V | Opposite | De/acrobaat/verdedigt | De/goochelaar/beschermt |
| V | Opposite | De/minister/bereidt | De/dief/schildert |
| A | DiffPred | De/blauwe/vader | De/rode/vader |
| V | Identity | De/prins/wandelt | De/prins/wandelt |
| V | Opposite | De/redacteur/danst | De/schrijver/valt/aan |
| A | Opposite | De/trage/gitarist | De/roze/zanger |
| A | DiffPred | De/jonge/acteur | De/zachte/acteur |
| A | DiffSubj | De/botte/stalker | De/botte/crimineel |
| A | Opposite | De/depressieve/monteur | De/sombere/agent |
| A | DiffSubj | De/dramatische/leraar | De/dramatische/verpleegster |
| A | Opposite | De/leuke/acrobaat | De/magere/goochelaar |
| A | DiffPred | De/depressieve/monteur | De/sombere/monteur |
| V | DiffPred | De/acrobaat/kookt | De/acrobaat/traint |
| A | Opposite | De/nieuwe/koning | De/doffe/hertog |
| A | Identity | De/jonge/acteur | De/jonge/acteur |
| V | DiffPred | De/conducteur/betovert | De/conducteur/hypnotiseert |
| A | Opposite | De/dankbare/slaaf | De/trouwe/meester |
| V | Identity | De/redacteur/bidt | De/redacteur/bidt |
| A | DiffPred | De/dove/redacteur | De/knappe/redacteur |
| A | DiffPred | Het/dramatische/meisje | Het/enge/meisje |
| V | Identity | De/minister/bereidt | De/minister/bereidt |
| V | Opposite | De/huisarts/gooit | De/chirurg/vangt |
| V | Identity | De/slaaf/fraudeert | De/slaaf/fraudeert |
| A | DiffPred | De/teleurgestelde/vader | De/blije/vader |
| A | Identity | Het/dove/slachtoffer | Het/dove/slachtoffer |
| A | Identity | De/drukke/piraat | De/drukke/piraat |
| A | DiffSubj | De/harde/stalker | De/harde/crimineel |
| V | DiffPred | De/acteur/luistert | De/acteur/zingt |
| A | DiffSubj | De/matige/acrobaat | De/matige/goochelaar |
| A | Opposite | De/heldhaftige/redacteur | De/dappere/schrijver |
| A | Identity | De/groene/prins | De/groene/prins |
| A | DiffPred | De/kwaadaardige/conducteur | De/bedrieglijke/conducteur |
| A | DiffPred | De/zwakke/orthodontist | De/sterke/orthodontist |
| V | Identity | De/minister/eet | De/minister/eet |
| V | DiffPred | Het/kind/betreedt | Het/kind/verlaat |
| A | Opposite | De/nieuwe/jager | De/doffe/kapper |
| V | Identity | De/moordenaar/vermoordt | De/moordenaar/vermoordt |
| A | DiffSubj | De/jonge/jager | De/jonge/kapper |
| V | Opposite | De/koning/betovert | De/hertog/hypnotiseert |
| A | DiffPred | De/fantastische/slager | De/geweldige/slager |
| V | DiffSubj | De/leraar/koopt | De/verpleegster/koopt |
| A | Opposite | De/kwaadaardige/koning | De/bedrieglijke/hertog |
| A | DiffSubj | De/glimmende/orthodontist | De/glimmende/gijzelaar |
| V | Identity | Het/meisje/bereidt | Het/meisje/bereidt |
| V | DiffSubj | De/prins/zit | De/prinses/zit |
| A | DiffSubj | De/dove/stalker | De/dove/crimineel |
| A | Opposite | Het/botte/slachtoffer | De/onbeleefde/inspecteur |
| V | Opposite | De/dirigent/verdedigt | De/brandweerman/beschermt |
| V | Opposite | De/jager/geeft | De/kapper/besproeit |
| A | Opposite | De/paarse/moordenaar | De/glinsterende/activist |
| V | Identity | De/scholier/onderzoekt | De/scholier/onderzoekt |
| A | DiffSubj | De/paarse/gitarist | De/paarse/zanger |
| A | Identity | De/matige/slaaf | De/matige/slaaf |
| V | DiffPred | De/leraar/eet | De/leraar/drinkt |
| V | DiffPred | Het/slachtoffer/gooit | Het/slachtoffer/vangt |
| A | Identity | De/luidruchtige/leraar | De/luidruchtige/leraar |
| V | DiffSubj | De/monteur/kookt | De/agent/kookt |
| V | DiffPred | Het/meisje/koopt | Het/meisje/krijgt |
| A | Opposite | De/groene/slager | De/gladde/groenteman |
| V | DiffPred | De/stalker/bidt | De/stalker/helpt |
| V | DiffSubj | Het/kind/wandelt | De/psycholoog/wandelt |
| A | DiffSubj | De/jonge/acteur | De/jonge/bezoeker |
| A | DiffPred | De/vermoeide/piraat | De/energieke/piraat |
| A | DiffSubj | De/kwaadaardige/conducteur | De/kwaadaardige/machinist |
| V | DiffSubj | De/slaaf/verdedigt | De/meester/verdedigt |
| A | Identity | De/leuke/monteur | De/leuke/monteur |
| V | DiffSubj | De/gitarist/onderzoekt | De/zanger/onderzoekt |
| V | Opposite | De/orthodontist/wijst/af | De/gijzelaar/fluit |
| A | DiffSubj | Het/dramatische/meisje | De/dramatische/jongen |
| V | DiffPred | De/huisarts/bidt | De/huisarts/helpt |
| V | DiffPred | De/slaaf/verdedigt | De/slaaf/beschermt |
| V | DiffSubj | De/koning/brabbelt | De/hertog/brabbelt |
| V | Opposite | De/redacteur/bidt | De/schrijver/helpt |
| V | Opposite | Het/meisje/koopt | De/jongen/krijgt |
| A | DiffSubj | De/matige/slaaf | De/matige/meester |
| V | Opposite | De/koning/geeft | De/hertog/besproeit |
| A | DiffSubj | De/jonge/koning | De/jonge/hertog |
| V | DiffSubj | De/slager/betreedt | De/groenteman/betreedt |
| V | Identity | Het/kind/betreedt | Het/kind/betreedt |
| A | DiffPred | De/dove/huisarts | De/knappe/huisarts |
| V | DiffSubj | De/acteur/luistert | De/bezoeker/luistert |
| A | Identity | De/nieuwe/acteur | De/nieuwe/acteur |
| A | Identity | De/dove/huisarts | De/dove/huisarts |
| A | DiffSubj | De/blauwe/leraar | De/blauwe/verpleegster |
| V | DiffSubj | De/scholier/vermoordt | De/student/vermoordt |
| V | Opposite | De/moordenaar/vermoordt | De/activist/schrijft |
| A | Identity | De/paarse/gitarist | De/paarse/gitarist |
| A | DiffSubj | De/verdrietige/acteur | De/verdrietige/bezoeker |
| A | Opposite | De/trage/orthodontist | De/roze/gijzelaar |
| V | DiffSubj | De/huisarts/gooit | De/chirurg/gooit |
| V | DiffSubj | De/slaaf/verstuurt | De/meester/verstuurt |
| A | Opposite | De/matige/dirigent | De/geschikte/brandweerman |
| A | Identity | De/botte/stalker | De/botte/stalker |
| A | DiffSubj | De/trage/moordenaar | De/trage/activist |
| V | DiffSubj | De/slager/ziet | De/groenteman/ziet |
| A | Identity | De/glimmende/scholier | De/glimmende/scholier |
| A | Opposite | De/leuke/monteur | De/magere/agent |
| V | Opposite | Het/slachtoffer/gooit | De/inspecteur/vangt |
| V | DiffPred | De/huisarts/gooit | De/huisarts/vangt |
| V | DiffPred | De/minister/eet | De/minister/drinkt |
| V | DiffPred | De/orthodontist/onderzoekt | De/orthodontist/controleert |
| A | Opposite | Het/blauwe/meisje | De/rode/jongen |
| A | DiffPred | Het/drukke/kind | Het/oranje/kind |
| A | Opposite | De/blauwe/vader | De/rode/moeder |
| A | DiffSubj | De/groene/prins | De/groene/prinses |
| A | Opposite | De/paarse/orthodontist | De/glinsterende/gijzelaar |
| A | Opposite | Het/vermoeide/kind | De/energieke/psycholoog |
| V | DiffPred | De/minister/bereidt | De/minister/schildert |
| A | Identity | De/nieuwe/koning | De/nieuwe/koning |
| V | Identity | De/acrobaat/verstuurt | De/acrobaat/verstuurt |
| V | Opposite | De/koning/luistert | De/hertog/zingt |
| A | Identity | De/heldhaftige/stalker | De/heldhaftige/stalker |
| V | DiffSubj | De/minister/typt | De/dief/typt |
| A | Identity | De/harde/huisarts | De/harde/huisarts |
| A | Identity | De/depressieve/dirigent | De/depressieve/dirigent |
| V | DiffSubj | Het/kind/betreedt | De/psycholoog/betreedt |
| A | DiffSubj | De/leuke/acrobaat | De/leuke/goochelaar |
| A | DiffPred | De/verdrietige/acteur | De/boze/acteur |
| V | DiffSubj | De/piraat/betreedt | De/smid/betreedt |
| A | Opposite | De/teleurgestelde/leraar | De/blije/verpleegster |
| V | DiffSubj | De/scholier/wijst/af | De/student/wijst/af |
| V | Opposite | De/minister/typt | De/dief/veroordeelt |
| A | Opposite | De/kwaadaardige/conducteur | De/bedrieglijke/machinist |
| V | DiffSubj | Het/meisje/typt | De/jongen/typt |
| V | Opposite | De/orthodontist/onderzoekt | De/gijzelaar/controleert |
| V | Opposite | De/conducteur/luistert | De/machinist/zingt |
| A | Opposite | De/jonge/acteur | De/zachte/bezoeker |
| A | DiffSubj | De/nieuwe/conducteur | De/nieuwe/machinist |
| V | Opposite | Het/slachtoffer/bidt | De/inspecteur/helpt |
| A | DiffPred | De/botte/huisarts | De/onbeleefde/huisarts |
| A | Opposite | De/glimmende/orthodontist | De/glanzende/gijzelaar |
| V | DiffSubj | De/slaaf/kookt | De/meester/kookt |
| A | DiffPred | De/botte/stalker | De/onbeleefde/stalker |
| V | Identity | De/koning/brabbelt | De/koning/brabbelt |
| V | DiffSubj | De/redacteur/springt | De/schrijver/springt |
| A | DiffPred | De/luidruchtige/minister | De/bruine/minister |
| A | DiffSubj | De/nieuwe/koning | De/nieuwe/hertog |
| A | DiffSubj | De/kwaadaardige/acteur | De/kwaadaardige/bezoeker |
| A | Opposite | De/vermoeide/slager | De/energieke/groenteman |
| V | DiffPred | Het/meisje/typt | Het/meisje/veroordeelt |
| A | Identity | De/matige/dirigent | De/matige/dirigent |
| V | DiffPred | De/conducteur/geeft | De/conducteur/besproeit |
| V | Opposite | De/vader/bereidt | De/moeder/schildert |
| A | DiffPred | De/dove/stalker | De/knappe/stalker |
| V | Opposite | De/moordenaar/wijst/af | De/activist/fluit |
| V | DiffPred | De/redacteur/springt | De/redacteur/valt |
| V | Opposite | De/piraat/ziet | De/smid/pakt |
| V | Identity | De/slaaf/verdedigt | De/slaaf/verdedigt |
| A | Opposite | Het/teleurgestelde/meisje | De/blije/jongen |
| A | DiffPred | De/fantastische/piraat | De/geweldige/piraat |
| A | Identity | De/verdrietige/conducteur | De/verdrietige/conducteur |
| A | DiffSubj | Het/blauwe/meisje | De/blauwe/jongen |
| A | DiffSubj | De/luidruchtige/vader | De/luidruchtige/moeder |
| A | DiffSubj | De/trage/orthodontist | De/trage/gijzelaar |
| V | Identity | De/acrobaat/fraudeert | De/acrobaat/fraudeert |
| V | Identity | De/slager/zit | De/slager/zit |
| A | DiffSubj | De/teleurgestelde/vader | De/teleurgestelde/moeder |
| V | DiffSubj | De/moordenaar/verstopt | De/activist/verstopt |
| A | DiffSubj | Het/luidruchtige/meisje | De/luidruchtige/jongen |
| A | DiffSubj | Het/groene/kind | De/groene/psycholoog |
| V | Opposite | De/slaaf/verdedigt | De/meester/beschermt |
| A | Identity | De/verdrietige/koning | De/verdrietige/koning |
| V | DiffPred | De/dirigent/fraudeert | De/dirigent/sterft |
| A | Identity | Het/fantastische/kind | Het/fantastische/kind |
| V | DiffPred | De/acteur/betovert | De/acteur/hypnotiseert |
| A | Opposite | De/verdrietige/conducteur | De/boze/machinist |
| A | Opposite | De/dramatische/minister | De/enge/dief |
| A | DiffSubj | De/verdrietige/koning | De/verdrietige/hertog |
| A | DiffPred | De/depressieve/dirigent | De/sombere/dirigent |
| A | DiffPred | De/vermoeide/prins | De/energieke/prins |
| V | DiffSubj | De/prins/betreedt | De/prinses/betreedt |
| V | DiffPred | De/prins/ziet | De/prins/pakt |
| V | Identity | De/huisarts/danst | De/huisarts/danst |
| V | DiffSubj | De/prins/ziet | De/prinses/ziet |
| V | DiffSubj | De/jager/brabbelt | De/kapper/brabbelt |
| V | Identity | De/moordenaar/onderzoekt | De/moordenaar/onderzoekt |
| A | DiffSubj | De/nieuwe/jager | De/nieuwe/kapper |
| V | DiffSubj | De/slager/zit | De/groenteman/zit |
| A | DiffPred | De/zwakke/moordenaar | De/sterke/moordenaar |
| A | DiffSubj | Het/vermoeide/kind | De/vermoeide/psycholoog |
| V | Identity | De/minister/koopt | De/minister/koopt |
| V | DiffSubj | De/prins/wandelt | De/prinses/wandelt |
| V | Identity | De/scholier/vermoordt | De/scholier/vermoordt |
| V | DiffSubj | De/moordenaar/vermoordt | De/activist/vermoordt |
| V | DiffSubj | De/vader/typt | De/moeder/typt |
| A | DiffPred | De/glimmende/gitarist | De/glanzende/gitarist |
| V | Identity | Het/slachtoffer/gooit | Het/slachtoffer/gooit |
| A | Identity | De/zwakke/moordenaar | De/zwakke/moordenaar |
| A | DiffSubj | De/dankbare/monteur | De/dankbare/agent |
| A | DiffPred | De/luidruchtige/vader | De/bruine/vader |
| A | DiffPred | Het/blauwe/meisje | Het/rode/meisje |
| V | Opposite | Het/kind/betreedt | De/psycholoog/verlaat |
| V | DiffSubj | De/minister/eet | De/dief/eet |
| V | DiffSubj | De/jager/betovert | De/kapper/betovert |
| A | Identity | De/groene/piraat | De/groene/piraat |
| V | Opposite | De/moordenaar/onderzoekt | De/activist/controleert |
| V | Opposite | De/monteur/verstuurt | De/agent/ontvangt |
| V | DiffPred | De/vader/typt | De/vader/veroordeelt |
| A | Identity | De/verdrietige/jager | De/verdrietige/jager |
| A | Identity | Het/harde/slachtoffer | Het/harde/slachtoffer |
| A | Opposite | De/fantastische/piraat | De/geweldige/smid |
| V | Identity | De/huisarts/gooit | De/huisarts/gooit |
| A | DiffSubj | De/depressieve/dirigent | De/depressieve/brandweerman |
| V | Identity | De/monteur/fraudeert | De/monteur/fraudeert |
| A | Identity | De/fantastische/prins | De/fantastische/prins |
| A | Opposite | De/luidruchtige/minister | De/bruine/dief |
| A | DiffPred | De/dramatische/leraar | De/enge/leraar |
| V | DiffPred | De/slaaf/kookt | De/slaaf/traint |
| V | Opposite | De/minister/eet | De/dief/drinkt |
| A | Identity | De/depressieve/slaaf | De/depressieve/slaaf |
| V | Opposite | De/vader/eet | De/moeder/drinkt |
| V | DiffSubj | De/acteur/geeft | De/bezoeker/geeft |
| V | Opposite | Het/kind/ziet | De/psycholoog/pakt |
| PredicateType | AnswerType | Target | A |
| V | DiffPred | De/goochelaar/ontvangt | De/goochelaar/verstuurt |
| V | DiffPred | De/smid/bakt | De/smid/zit |
| V | DiffSubj | De/brandweerman/ontvangt | De/dirigent/ontvangt |
| V | Opposite | De/crimineel/valt | De/stalker/springt |
| V | DiffPred | De/brandweerman/ontvangt | De/brandweerman/verstuurt |
| A | Opposite | De/bedrieglijke/bezoeker | De/kwaadaardige/acteur |
| A | Identity | De/dappere/schrijver | De/dappere/schrijver |
| A | DiffPred | De/roze/activist | De/trage/activist |
| V | Opposite | De/goochelaar/sterft/ | De/acrobaat/fraudeert |
| A | DiffPred | De/bedrieglijke/bezoeker | De/kwaadaardige/bezoeker |
| V | Opposite | De/prinses/bakt | De/prins/zit |
| A | Opposite | De/gladde/prinses | De/groene/prins |
| A | Identity | De/magere/meester | De/magere/meester |
| A | Opposite | De/bruine/verpleegster | De/luidruchtige/leraar |
| V | Opposite | De/chirurg/helpt | De/huisarts/bidt |
| V | DiffPred | De/hertog/zingt | De/hertog/luistert |
| A | Opposite | De/trouwe/goochelaar | De/dankbare/acrobaat |
| A | Opposite | De/dappere/chirurg | De/heldhaftige/huisarts |
| V | DiffPred | De/kapper/zingt | De/kapper/luistert |
| A | DiffPred | De/blije/dief | De/teleurgestelde/dief |
| V | Opposite | De/agent/traint | De/monteur/kookt |
| A | Identity | De/energieke/smid | De/energieke/smid |
| V | DiffSubj | De/smid/pakt | De/piraat/pakt |
| A | Identity | De/blije/jongen | De/blije/jongen |
| V | Identity | De/bezoeker/hypnotiseert | De/bezoeker/hypnotiseert |
| A | Identity | De/bruine/dief | De/bruine/dief |
| A | DiffSubj | De/dappere/crimineel | De/dappere/stalker |
| A | Identity | De/enge/jongen | De/enge/jongen |
| V | DiffSubj | De/activist/controleert | De/moordenaar/controleert |
| V | Identity | De/bezoeker/besproeit | De/bezoeker/besproeit |
| V | DiffSubj | De/gijzelaar/schrijft | De/orthodontist/schrijft |
| A | Identity | De/glinsterende/activist | De/glinsterende/activist |
| V | Identity | De/bezoeker/citeert | De/bezoeker/citeert |
| A | Identity | De/bruine/jongen | De/bruine/jongen |
| A | Opposite | De/oranje/psycholoog | Het/drukke/kind |
| V | Identity | De/verpleegster/veroordeelt | De/verpleegster/veroordeelt |
| V | Identity | De/kapper/hypnotiseert | De/kapper/hypnotiseert |
| V | Identity | De/moeder/krijgt | De/moeder/krijgt |
| V | Identity | De/machinist/zingt | De/machinist/zingt |
| V | DiffSubj | De/machinist/hypnotiseert | De/conducteur/hypnotiseert |
| V | Opposite | De/prinses/verlaat | De/prins/betreedt |
| A | Identity | De/oranje/psycholoog | De/oranje/psycholoog |
| A | Identity | De/zachte/kapper | De/zachte/kapper |
| A | DiffPred | De/geweldige/psycholoog | De/fantastische/psycholoog |
| V | Opposite | De/crimineel/vangt | De/stalker/gooit |
| A | Opposite | De/knappe/chirurg | De/dove/huisarts |
| V | DiffPred | De/verpleegster/krijgt | De/verpleegster/koopt |
| A | Identity | De/blije/dief | De/blije/dief |
| V | Identity | De/crimineel/valt/aan | De/crimineel/valt/aan |
| A | DiffPred | De/gladde/psycholoog | De/groene/psycholoog |
| A | Opposite | De/oranje/groenteman | De/drukke/slager |
| V | DiffSubj | De/smid/bakt | De/piraat/bakt |
| V | Opposite | De/schrijver/vangt | De/redacteur/gooit |
| V | Identity | De/machinist/besproeit | De/machinist/besproeit |
| A | Identity | De/rode/jongen | De/rode/jongen |
| V | DiffPred | De/schrijver/valt/aan | De/schrijver/danst |
| V | Identity | De/schrijver/vangt | De/schrijver/vangt |
| A | Opposite | De/blije/dief | De/teleurgestelde/minister |
| V | DiffPred | De/schrijver/vangt | De/schrijver/gooit |
| V | Identity | De/verpleegster/drinkt | De/verpleegster/drinkt |
| V | DiffPred | De/groenteman/verlaat | De/groenteman/betreedt |
| A | Opposite | De/rode/dief | De/blauwe/minister |
| V | Identity | De/groenteman/verlaat | De/groenteman/verlaat |
| A | DiffPred | De/rode/verpleegster | De/blauwe/verpleegster |
| V | Opposite | De/goochelaar/traint | De/acrobaat/kookt |
| V | Identity | De/agent/beschermt | De/agent/beschermt |
| A | Opposite | De/sterke/zanger | De/zwakke/gitarist |
| V | Opposite | De/zanger/controleert | De/gitarist/onderzoekt |
| A | DiffPred | De/zachte/kapper | De/jonge/kapper |
| V | Opposite | De/groenteman/pakt | De/slager/ziet |
| V | DiffSubj | De/smid/wint | De/piraat/wint |
| V | Opposite | De/kapper/zingt | De/jager/luistert |
| V | Identity | De/prinses/verlaat | De/prinses/verlaat |
| V | Opposite | De/smid/bakt | De/piraat/zit |
| A | Opposite | De/knappe/schrijver | De/dove/redacteur |
| V | Identity | De/schrijver/valt/aan | De/schrijver/valt/aan |
| A | Identity | De/energieke/psycholoog | De/energieke/psycholoog |
| A | DiffSubj | De/boze/kapper | De/boze/jager |
| V | DiffPred | De/hertog/citeert | De/hertog/brabbelt |
| V | Identity | De/brandweerman/beschermt | De/brandweerman/beschermt |
| V | Identity | De/crimineel/vangt | De/crimineel/vangt |
| A | Identity | De/zachte/machinist | De/zachte/machinist |
| V | Identity | De/crimineel/valt | De/crimineel/valt |
| A | DiffPred | De/enge/moeder | De/dramatische/moeder |
| A | Opposite | De/glanzende/student | De/glimmende/scholier |
| V | Opposite | De/meester/sterft | De/slaaf/fraudeert |
| V | DiffPred | De/gijzelaar/schrijft | De/gijzelaar/vermoordt |
| V | Identity | De/brandweerman/sterft | De/brandweerman/sterft |
| A | DiffSubj | De/trouwe/goochelaar | De/trouwe/acrobaat |
| V | Identity | De/smid/wint | De/smid/wint |
| V | DiffSubj | De/agent/sterft | De/monteur/sterft |
| A | DiffPred | De/blije/jongen | De/teleurgestelde/jongen |
| A | Identity | De/bedrieglijke/kapper | De/bedrieglijke/kapper |
| V | DiffSubj | De/bezoeker/citeert | De/acteur/citeert |
| A | Opposite | De/roze/activist | De/trage/moordenaar |
| A | DiffPred | De/trouwe/goochelaar | De/dankbare/goochelaar |
| A | Identity | De/bruine/moeder | De/bruine/moeder |
| V | DiffSubj | De/dief/schildert | De/minister/schildert |
| A | DiffSubj | De/bruine/dief | De/bruine/minister |
| V | Identity | De/gijzelaar/schrijft | De/gijzelaar/schrijft |
| V | Identity | De/gijzelaar/controleert | De/gijzelaar/controleert |
| A | Opposite | De/geschikte/agent | De/matige/monteur |
| V | Identity | De/groenteman/wint | De/groenteman/wint |
| V | Identity | De/verpleegster/schildert | De/verpleegster/schildert |
| V | Opposite | De/machinist/citeert | De/conducteur/brabbelt |
| V | DiffPred | De/activist/verbergt | De/activist/verstopt |
| A | Opposite | De/energieke/prinses | De/vermoeide/prins |
| V | DiffSubj | De/machinist/citeert | De/conducteur/citeert |
| A | DiffPred | De/geschikte/agent | De/matige/agent |
| A | DiffSubj | De/trouwe/brandweerman | De/trouwe/dirigent |
| V | DiffPred | De/agent/ontvangt | De/agent/verstuurt |
| V | Identity | De/moeder/veroordeelt | De/moeder/veroordeelt |
| A | Identity | De/roze/zanger | De/roze/zanger |
| A | DiffSubj | De/knappe/chirurg | De/knappe/huisarts |
| A | DiffPred | De/geschikte/meester | De/matige/meester |
| V | DiffSubj | De/psycholoog/pakt | Het/kind/pakt |
| V | DiffSubj | De/kapper/zingt | De/jager/zingt |
| V | DiffPred | De/zanger/schrijft | De/zanger/vermoordt |
| A | DiffPred | De/sombere/goochelaar | De/depressieve/goochelaar |
| V | DiffSubj | De/gijzelaar/fluit | De/orthodontist/fluit |
| V | Opposite | De/student/verbergt | De/scholier/verstopt |
| A | Opposite | De/ruwe/schrijver | De/harde/redacteur |
| V | DiffSubj | De/zanger/verbergt | De/gitarist/verbergt |
| A | Identity | De/blije/moeder | De/blije/moeder |
| V | Opposite | De/schrijver/valt | De/redacteur/springt |
| A | DiffSubj | De/trouwe/meester | De/trouwe/slaaf |
| V | Opposite | De/student/controleert | De/scholier/onderzoekt |
| A | Opposite | De/boze/hertog | De/verdrietige/koning |
| V | Identity | De/gijzelaar/fluit | De/gijzelaar/fluit |
| A | DiffPred | De/gladde/prinses | De/groene/prinses |
| A | Opposite | De/roze/student | De/trage/scholier |
| V | DiffSubj | De/jongen/drinkt | Het/meisje/drinkt |
| A | DiffSubj | De/oranje/groenteman | De/oranje/slager |
| V | Identity | De/zanger/fluit | De/zanger/fluit |
| V | DiffPred | De/inspecteur/helpt | De/inspecteur/bidt |
| V | DiffPred | De/hertog/besproeit | De/hertog/geeft |
| A | DiffSubj | De/bedrieglijke/hertog | De/bedrieglijke/koning |
| A | Opposite | De/doffe/bezoeker | De/nieuwe/acteur |
| V | DiffSubj | De/chirurg/valt/aan | De/huisarts/valt/aan |
| A | Identity | De/trouwe/brandweerman | De/trouwe/brandweerman |
| A | Opposite | De/bruine/jongen | Het/luidruchtige/meisje |
| V | DiffSubj | De/brandweerman/traint | De/dirigent/traint |
| A | DiffPred | De/energieke/groenteman | De/vermoeide/groenteman |
| V | Opposite | De/verpleegster/veroordeelt | De/leraar/typt |
| A | DiffPred | De/onbeleefde/schrijver | De/botte/schrijver |
| A | DiffSubj | De/oranje/prinses | De/oranje/prins |
| V | Opposite | De/hertog/citeert | De/koning/brabbelt |
| A | Identity | De/boze/bezoeker | De/boze/bezoeker |
| V | DiffPred | De/hertog/hypnotiseert | De/hertog/betovert |
| V | DiffPred | De/prinses/wint | De/prinses/wandelt |
| A | DiffPred | De/sterke/zanger | De/zwakke/zanger |
| A | Opposite | De/ruwe/chirurg | De/harde/huisarts |
| V | DiffPred | De/zanger/fluit | De/zanger/wijst/af |
| V | Identity | De/jongen/krijgt | De/jongen/krijgt |
| A | Opposite | De/blije/moeder | De/teleurgestelde/vader |
| V | DiffSubj | De/student/verbergt | De/scholier/verbergt |
| A | DiffSubj | De/gladde/smid | De/gladde/piraat |
| A | DiffPred | De/glanzende/student | De/glimmende/student |
| A | Opposite | De/energieke/smid | De/vermoeide/piraat |
| A | Opposite | De/boze/kapper | De/verdrietige/jager |
| A | Identity | De/magere/brandweerman | De/magere/brandweerman |
| A | DiffPred | De/dappere/inspecteur | De/heldhaftige/inspecteur |
| V | DiffPred | De/student/verbergt | De/student/verstopt |
| V | Opposite | De/verpleegster/drinkt | De/leraar/eet |
| A | DiffPred | De/ruwe/chirurg | De/harde/chirurg |
| A | Identity | De/rode/moeder | De/rode/moeder |
| A | DiffPred | De/glinsterende/activist | De/paarse/activist |
| A | DiffSubj | De/glinsterende/activist | De/glinsterende/moordenaar |
| V | DiffPred | De/schrijver/helpt | De/schrijver/bidt |
| A | Opposite | De/sterke/activist | De/zwakke/moordenaar |
| A | Identity | De/doffe/machinist | De/doffe/machinist |
| A | DiffSubj | De/sterke/gijzelaar | De/sterke/orthodontist |
| V | DiffSubj | De/student/controleert | De/scholier/controleert |
| V | DiffPred | De/chirurg/valt | De/chirurg/springt |
| V | Identity | De/psycholoog/pakt | De/psycholoog/pakt |
| A | DiffSubj | De/bruine/verpleegster | De/bruine/leraar |
| V | DiffSubj | De/goochelaar/beschermt | De/acrobaat/beschermt |
| A | Identity | De/geschikte/goochelaar | De/geschikte/goochelaar |
| A | Identity | De/glinsterende/gijzelaar | De/glinsterende/gijzelaar |
| V | DiffPred | De/psycholoog/wint | De/psycholoog/wandelt |
| V | Opposite | De/bezoeker/citeert | De/acteur/brabbelt |
| V | DiffSubj | De/jongen/schildert | Het/meisje/schildert |
| A | Opposite | De/sterke/student | De/zwakke/scholier |
| A | Opposite | De/bedrieglijke/kapper | De/kwaadaardige/jager |
| A | Identity | De/zachte/hertog | De/zachte/hertog |
| V | DiffPred | De/groenteman/wint | De/groenteman/wandelt |
| A | Identity | De/glanzende/activist | De/glanzende/activist |
| V | DiffSubj | De/machinist/besproeit | De/conducteur/besproeit |
| A | Opposite | De/glinsterende/zanger | De/paarse/gitarist |
| A | DiffPred | De/magere/goochelaar | De/leuke/goochelaar |
| V | DiffSubj | De/brandweerman/beschermt | De/dirigent/beschermt |
| V | Identity | De/student/verbergt | De/student/verbergt |
| V | DiffPred | De/kapper/hypnotiseert | De/kapper/betovert |
| A | DiffPred | De/roze/zanger | De/trage/zanger |
| A | DiffPred | De/magere/brandweerman | De/leuke/brandweerman |
| A | DiffPred | De/energieke/psycholoog | De/vermoeide/psycholoog |
| V | Identity | De/psycholoog/bakt | De/psycholoog/bakt |
| V | Identity | De/jongen/veroordeelt | De/jongen/veroordeelt |
| A | Identity | De/rode/dief | De/rode/dief |
| A | DiffPred | De/gladde/smid | De/groene/smid |
| V | Opposite | De/gijzelaar/schrijft | De/orthodontist/vermoordt |
| V | Identity | De/kapper/citeert | De/kapper/citeert |
| V | DiffSubj | De/machinist/zingt | De/conducteur/zingt |
| V | DiffPred | De/smid/pakt | De/smid/ziet |
| V | Identity | De/chirurg/helpt | De/chirurg/helpt |
| A | DiffSubj | De/sterke/zanger | De/sterke/gitarist |
| A | DiffPred | De/bedrieglijke/hertog | De/kwaadaardige/hertog |
| V | DiffPred | De/moeder/krijgt | De/moeder/koopt |
| V | DiffPred | De/psycholoog/pakt | De/psycholoog/ziet |
| V | DiffPred | De/activist/fluit | De/activist/wijst/af |
| V | DiffPred | De/groenteman/pakt | De/groenteman/ziet |
| A | DiffSubj | De/roze/student | De/roze/scholier |
| A | DiffSubj | De/geweldige/groenteman | De/geweldige/slager |
| A | DiffPred | De/oranje/smid | De/drukke/smid |
| A | Identity | De/dappere/chirurg | De/dappere/chirurg |
| V | DiffPred | De/kapper/citeert | De/kapper/brabbelt |
| V | Opposite | De/moeder/krijgt | De/vader/koopt |
| V | Identity | De/brandweerman/traint | De/brandweerman/traint |
| V | DiffSubj | De/moeder/schildert | De/vader/schildert |
| V | DiffSubj | De/agent/ontvangt | De/monteur/ontvangt |
| V | Opposite | De/verpleegster/krijgt | De/leraar/koopt |
| V | Opposite | De/prinses/pakt | De/prins/ziet |
| A | Identity | De/trouwe/meester | De/trouwe/meester |
| V | DiffPred | De/inspecteur/valt | De/inspecteur/springt |
| A | DiffSubj | De/geweldige/prinses | De/geweldige/prins |
| A | DiffPred | De/knappe/inspecteur | De/dove/inspecteur |
| V | Identity | De/moeder/schildert | De/moeder/schildert |
| V | Opposite | De/zanger/schrijft | De/gitarist/vermoordt |
| V | Opposite | De/activist/verbergt | De/moordenaar/verstopt |
| A | Opposite | De/glanzende/activist | De/glimmende/moordenaar |
| A | DiffSubj | De/dappere/inspecteur | Het/dappere/slachtoffer |
| A | DiffPred | De/bruine/verpleegster | De/luidruchtige/verpleegster |
| A | DiffPred | De/dappere/crimineel | De/heldhaftige/crimineel |
| V | Identity | De/smid/bakt | De/smid/bakt |
| V | DiffPred | De/agent/beschermt | De/agent/verdedigt |
| V | DiffSubj | De/inspecteur/valt | Het/slachtoffer/valt |
| V | Opposite | De/jongen/schildert | Het/meisje/bereidt |
| A | Opposite | De/knappe/crimineel | De/dove/stalker |
| V | DiffPred | De/gijzelaar/verbergt | De/gijzelaar/verstopt |
| A | DiffSubj | De/geweldige/smid | De/geweldige/piraat |
| V | Opposite | De/crimineel/helpt | De/stalker/bidt |
| A | DiffPred | De/glinsterende/student | De/paarse/student |
| A | DiffPred | De/ruwe/crimineel | De/harde/crimineel |
| A | DiffPred | De/geschikte/brandweerman | De/matige/brandweerman |
| V | Identity | De/schrijver/valt | De/schrijver/valt |
| A | DiffSubj | De/rode/moeder | De/rode/vader |
| A | DiffPred | De/oranje/prinses | De/drukke/prinses |
| V | Opposite | De/moeder/veroordeelt | De/vader/typt |
| A | DiffSubj | De/geweldige/psycholoog | Het/geweldige/kind |
| A | DiffSubj | De/bedrieglijke/kapper | De/bedrieglijke/jager |
| V | Opposite | De/verpleegster/schildert | De/leraar/bereidt |
| V | DiffPred | De/moeder/drinkt | De/moeder/eet |
| V | Opposite | De/meester/ontvangt | De/slaaf/verstuurt |
| V | Identity | De/psycholoog/wint | De/psycholoog/wint |
| V | DiffPred | De/groenteman/bakt | De/groenteman/zit |
| V | DiffSubj | De/activist/fluit | De/moordenaar/fluit |
| A | DiffPred | De/dappere/schrijver | De/heldhaftige/schrijver |
| A | Opposite | De/oranje/smid | De/drukke/piraat |
| V | DiffPred | De/jongen/schildert | De/jongen/bereidt |
| V | DiffSubj | De/agent/beschermt | De/monteur/beschermt |
| V | Opposite | De/inspecteur/valt/aan | Het/slachtoffer/danst |
| V | Identity | De/prinses/bakt | De/prinses/bakt |
| A | Opposite | De/geschikte/meester | De/matige/slaaf |
| A | Opposite | De/enge/jongen | Het/dramatische/meisje |
| V | DiffPred | De/student/controleert | De/student/onderzoekt |
| A | DiffPred | De/magere/meester | De/leuke/meester |
| A | Opposite | De/glanzende/zanger | De/glimmende/gitarist |
| V | DiffSubj | De/verpleegster/schildert | De/leraar/schildert |
| V | DiffPred | De/brandweerman/beschermt | De/brandweerman/verdedigt |
| A | Opposite | De/trouwe/brandweerman | De/dankbare/dirigent |
| A | Opposite | De/sombere/goochelaar | De/depressieve/acrobaat |
| A | DiffSubj | De/glanzende/activist | De/glanzende/moordenaar |
| V | Identity | De/goochelaar/beschermt | De/goochelaar/beschermt |
| A | DiffSubj | De/blije/dief | De/blije/minister |
| V | DiffPred | De/meester/sterft | De/meester/fraudeert |
| V | Identity | De/jongen/drinkt | De/jongen/drinkt |
| A | Opposite | De/trouwe/agent | De/dankbare/monteur |
| V | DiffPred | De/prinses/bakt | De/prinses/zit |
| A | Opposite | De/dappere/inspecteur | Het/heldhaftige/slachtoffer |
| V | DiffPred | De/chirurg/valt/aan | De/chirurg/danst |
| A | DiffSubj | De/gladde/groenteman | De/gladde/slager |
| A | DiffSubj | De/onbeleefde/schrijver | De/onbeleefde/redacteur |
| V | DiffSubj | De/inspecteur/valt/aan | Het/slachtoffer/valt/aan |
| V | Opposite | De/meester/traint | De/slaaf/kookt |
| A | DiffPred | De/glanzende/activist | De/glimmende/activist |
| A | DiffSubj | De/enge/dief | De/enge/minister |
| A | DiffSubj | De/energieke/smid | De/energieke/piraat |
| A | DiffPred | De/glinsterende/zanger | De/paarse/zanger |
| V | Opposite | De/machinist/hypnotiseert | De/conducteur/betovert |
| V | DiffPred | De/crimineel/vangt | De/crimineel/gooit |
| V | DiffSubj | De/zanger/schrijft | De/gitarist/schrijft |
| V | DiffSubj | De/jongen/krijgt | Het/meisje/krijgt |
| V | DiffPred | De/goochelaar/beschermt | De/goochelaar/verdedigt |
| V | Opposite | De/student/schrijft | De/scholier/vermoordt |
| V | DiffPred | De/machinist/citeert | De/machinist/brabbelt |
| A | Identity | De/glanzende/zanger | De/glanzende/zanger |
| V | Opposite | De/brandweerman/sterft | De/dirigent/fraudeert |
| A | DiffSubj | De/magere/agent | De/magere/monteur |
| V | DiffSubj | De/crimineel/valt/aan | De/stalker/valt/aan |
| V | DiffPred | De/student/fluit | De/student/wijst/af |
| A | Opposite | De/dappere/crimineel | De/heldhaftige/stalker |
| A | Identity | De/doffe/kapper | De/doffe/kapper |
| A | DiffSubj | De/knappe/schrijver | De/knappe/redacteur |
| A | DiffPred | De/bedrieglijke/kapper | De/kwaadaardige/kapper |
| A | DiffSubj | De/onbeleefde/inspecteur | Het/onbeleefde/slachtoffer |
| A | DiffSubj | De/ruwe/chirurg | De/ruwe/huisarts |
| V | DiffPred | De/zanger/controleert | De/zanger/onderzoekt |
| A | Opposite | De/geweldige/psycholoog | Het/fantastische/kind |
| V | DiffPred | De/dief/krijgt | De/dief/koopt |
| V | Identity | De/prinses/pakt | De/prinses/pakt |
| V | Identity | De/inspecteur/helpt | De/inspecteur/helpt |
| V | DiffSubj | De/gijzelaar/controleert | De/orthodontist/controleert |
| A | Identity | De/ruwe/crimineel | De/ruwe/crimineel |
| A | DiffPred | De/boze/machinist | De/verdrietige/machinist |
| V | DiffSubj | De/meester/sterft | De/slaaf/sterft |
| A | DiffPred | De/oranje/groenteman | De/drukke/groenteman |
| V | Opposite | De/bezoeker/besproeit | De/acteur/geeft |
| V | DiffPred | De/inspecteur/valt/aan | De/inspecteur/danst |
| V | DiffSubj | De/dief/krijgt | De/minister/krijgt |
| A | DiffSubj | De/oranje/psycholoog | Het/oranje/kind |
| V | Opposite | De/agent/beschermt | De/monteur/verdedigt |
| V | DiffSubj | De/gijzelaar/verbergt | De/orthodontist/verbergt |
| A | Identity | De/sterke/student | De/sterke/student |
| A | Identity | De/gladde/groenteman | De/gladde/groenteman |
| A | DiffSubj | De/oranje/smid | De/oranje/piraat |
| V | Identity | De/verpleegster/krijgt | De/verpleegster/krijgt |
| A | DiffSubj | De/dappere/chirurg | De/dappere/huisarts |
| A | Identity | De/knappe/crimineel | De/knappe/crimineel |
| V | DiffSubj | De/verpleegster/veroordeelt | De/leraar/veroordeelt |
| A | Identity | De/sombere/agent | De/sombere/agent |
| V | Identity | De/activist/verbergt | De/activist/verbergt |
| A | DiffPred | De/geschikte/goochelaar | De/matige/goochelaar |
| V | DiffSubj | De/bezoeker/hypnotiseert | De/acteur/hypnotiseert |
| V | Identity | De/brandweerman/ontvangt | De/brandweerman/ontvangt |
| A | DiffPred | De/trouwe/meester | De/dankbare/meester |
| V | Opposite | De/groenteman/wint | De/slager/wandelt |
| A | DiffPred | De/dappere/chirurg | De/heldhaftige/chirurg |
| V | Identity | De/kapper/zingt | De/kapper/zingt |
| V | Opposite | De/kapper/citeert | De/jager/brabbelt |
| V | Opposite | De/psycholoog/wint | Het/kind/wandelt |
| A | Identity | De/glanzende/gijzelaar | De/glanzende/gijzelaar |
| V | Opposite | De/zanger/verbergt | De/gitarist/verstopt |
| V | DiffPred | De/verpleegster/schildert | De/verpleegster/bereidt |
| V | Opposite | De/chirurg/valt | De/huisarts/springt |
| V | DiffPred | De/dief/veroordeelt | De/dief/typt |
| V | DiffSubj | De/goochelaar/traint | De/acrobaat/traint |
| A | Identity | De/sterke/zanger | De/sterke/zanger |
| A | Identity | De/oranje/groenteman | De/oranje/groenteman |
| A | DiffPred | De/boze/kapper | De/verdrietige/kapper |
| V | DiffSubj | De/schrijver/valt/aan | De/redacteur/valt/aan |
| A | Opposite | De/geweldige/prinses | De/fantastische/prins |
| A | Identity | De/enge/moeder | De/enge/moeder |
| A | Opposite | De/ruwe/crimineel | De/harde/stalker |
| A | Opposite | De/geschikte/goochelaar | De/matige/acrobaat |
| V | Identity | De/hertog/zingt | De/hertog/zingt |
| A | DiffSubj | De/energieke/groenteman | De/energieke/slager |
| V | DiffPred | De/bezoeker/citeert | De/bezoeker/brabbelt |
| A | DiffSubj | De/doffe/bezoeker | De/doffe/acteur |
| A | Opposite | De/boze/bezoeker | De/verdrietige/acteur |
| A | Opposite | De/rode/verpleegster | De/blauwe/leraar |
| V | Identity | De/moeder/drinkt | De/moeder/drinkt |
| V | DiffPred | De/verpleegster/veroordeelt | De/verpleegster/typt |
| A | Opposite | De/zachte/machinist | De/jonge/conducteur |
| A | DiffSubj | De/blije/jongen | Het/blije/meisje |
| A | DiffPred | De/ruwe/schrijver | De/harde/schrijver |
| A | DiffPred | De/enge/dief | De/dramatische/dief |
| V | DiffSubj | De/brandweerman/sterft | De/dirigent/sterft |
| V | Opposite | De/groenteman/bakt | De/slager/zit |
| V | DiffSubj | De/chirurg/valt | De/huisarts/valt |
| A | Opposite | De/geweldige/groenteman | De/fantastische/slager |
| A | DiffPred | De/roze/gijzelaar | De/trage/gijzelaar |
| A | Opposite | De/doffe/machinist | De/nieuwe/conducteur |
| A | DiffPred | De/geweldige/prinses | De/fantastische/prinses |
| A | Opposite | De/glinsterende/student | De/paarse/scholier |
| V | DiffPred | De/smid/wint | De/smid/wandelt |
| V | Identity | De/zanger/schrijft | De/zanger/schrijft |
| V | Identity | De/groenteman/pakt | De/groenteman/pakt |
| A | DiffSubj | De/sombere/agent | De/sombere/monteur |
| V | DiffPred | De/activist/schrijft | De/activist/vermoordt |
| A | Opposite | De/gladde/smid | De/groene/piraat |
| V | Identity | De/meester/traint | De/meester/traint |
| V | DiffPred | De/agent/traint | De/agent/kookt |
| V | Identity | De/zanger/verbergt | De/zanger/verbergt |
| A | Identity | De/trouwe/agent | De/trouwe/agent |
| A | Opposite | De/oranje/prinses | De/drukke/prins |
| A | Opposite | De/sombere/brandweerman | De/depressieve/dirigent |
| A | DiffSubj | De/ruwe/schrijver | De/ruwe/redacteur |
| A | Identity | De/onbeleefde/chirurg | De/onbeleefde/chirurg |
| A | DiffPred | De/glinsterende/gijzelaar | De/paarse/gijzelaar |
| A | DiffSubj | De/magere/meester | De/magere/slaaf |
| V | Identity | De/inspecteur/valt | De/inspecteur/valt |
| V | Opposite | De/crimineel/valt/aan | De/stalker/danst |
| A | DiffSubj | De/energieke/prinses | De/energieke/prins |
| A | DiffPred | De/sterke/student | De/zwakke/student |
| V | DiffPred | De/jongen/drinkt | De/jongen/eet |
| A | Identity | De/dappere/inspecteur | De/dappere/inspecteur |
| V | Identity | De/hertog/hypnotiseert | De/hertog/hypnotiseert |
| A | Identity | De/magere/goochelaar | De/magere/goochelaar |
| V | Opposite | De/prinses/wint | De/prins/wandelt |
| A | DiffSubj | De/rode/dief | De/rode/minister |
| A | DiffSubj | De/zachte/machinist | De/zachte/conducteur |
| A | Identity | De/enge/verpleegster | De/enge/verpleegster |
| V | Opposite | De/agent/sterft | De/monteur/fraudeert |
| A | DiffSubj | De/magere/brandweerman | De/magere/dirigent |
| A | Identity | De/enge/dief | De/enge/dief |
| A | Opposite | De/onbeleefde/crimineel | De/botte/stalker |
| V | DiffPred | De/prinses/verlaat | De/prinses/betreedt |
| V | Opposite | De/smid/verlaat | De/piraat/betreedt |
| V | DiffSubj | De/moeder/krijgt | De/vader/krijgt |
| A | DiffSubj | De/sterke/activist | De/sterke/moordenaar |
| V | DiffPred | De/student/schrijft | De/student/vermoordt |
| A | Identity | De/bedrieglijke/machinist | De/bedrieglijke/machinist |
| V | DiffPred | De/machinist/zingt | De/machinist/luistert |
| A | Identity | De/blije/verpleegster | De/blije/verpleegster |
| A | Identity | De/glinsterende/student | De/glinsterende/student |
| V | Identity | De/goochelaar/traint | De/goochelaar/traint |
| A | DiffSubj | De/ruwe/inspecteur | Het/ruwe/slachtoffer |
| A | Identity | De/energieke/prinses | De/energieke/prinses |
| V | Opposite | De/jongen/veroordeelt | Het/meisje/typt |
| V | Identity | De/machinist/hypnotiseert | De/machinist/hypnotiseert |
| A | Identity | De/roze/activist | De/roze/activist |
| A | DiffSubj | De/dappere/schrijver | De/dappere/redacteur |
| V | Identity | De/kapper/besproeit | De/kapper/besproeit |
| V | DiffPred | De/zanger/verbergt | De/zanger/verstopt |
| A | DiffPred | De/doffe/kapper | De/nieuwe/kapper |
| V | Opposite | De/bezoeker/zingt | De/acteur/luistert |
| A | Identity | De/gladde/psycholoog | De/gladde/psycholoog |
| V | DiffSubj | De/crimineel/vangt | De/stalker/vangt |
| V | DiffSubj | De/zanger/fluit | De/gitarist/fluit |
| V | DiffSubj | De/schrijver/helpt | De/redacteur/helpt |
| V | DiffPred | De/bezoeker/besproeit | De/bezoeker/geeft |
| V | DiffSubj | De/goochelaar/ontvangt | De/acrobaat/ontvangt |
| A | DiffSubj | De/onbeleefde/chirurg | De/onbeleefde/huisarts |
| V | DiffPred | De/moeder/schildert | De/moeder/bereidt |
| V | Opposite | De/psycholoog/bakt | Het/kind/zit |
| A | DiffSubj | De/glinsterende/student | De/glinsterende/scholier |
| V | Opposite | De/goochelaar/ontvangt | De/acrobaat/verstuurt |
| A | DiffSubj | De/knappe/inspecteur | Het/knappe/slachtoffer |
| A | Identity | De/onbeleefde/inspecteur | De/onbeleefde/inspecteur |
| V | Opposite | De/jongen/drinkt | Het/meisje/eet |
| A | Identity | De/sterke/gijzelaar | De/sterke/gijzelaar |
| A | Identity | De/oranje/prinses | De/oranje/prinses |
| A | DiffSubj | De/boze/machinist | De/boze/conducteur |
| A | DiffPred | De/roze/student | De/trage/student |
| A | DiffPred | De/magere/agent | De/leuke/agent |
| A | Identity | De/geschikte/agent | De/geschikte/agent |
| A | Identity | De/geweldige/groenteman | De/geweldige/groenteman |
| A | Opposite | De/enge/verpleegster | De/dramatische/leraar |
| V | Opposite | De/brandweerman/ontvangt | De/dirigent/verstuurt |
| V | DiffSubj | De/crimineel/valt | De/stalker/valt |
| A | DiffSubj | De/glanzende/student | De/glanzende/scholier |
| A | DiffPred | De/trouwe/brandweerman | De/dankbare/brandweerman |
| A | DiffSubj | De/sterke/student | De/sterke/scholier |
| A | Identity | De/rode/verpleegster | De/rode/verpleegster |
| V | DiffSubj | De/kapper/besproeit | De/jager/besproeit |
| V | Identity | De/machinist/citeert | De/machinist/citeert |
| A | Identity | De/ruwe/schrijver | De/ruwe/schrijver |
| V | Opposite | De/kapper/hypnotiseert | De/jager/betovert |
| V | DiffPred | De/meester/ontvangt | De/meester/verstuurt |
| V | DiffSubj | De/inspecteur/helpt | Het/slachtoffer/helpt |
| V | DiffSubj | De/hertog/hypnotiseert | De/koning/hypnotiseert |
| V | Identity | De/inspecteur/valt/aan | De/inspecteur/valt/aan |
| V | Opposite | De/smid/wint | De/piraat/wandelt |
| V | DiffSubj | De/goochelaar/sterft/ | De/acrobaat/sterft |
| A | Identity | De/roze/gijzelaar | De/roze/gijzelaar |
| A | Opposite | De/enge/moeder | De/dramatische/vader |
| A | DiffSubj | De/sombere/meester | De/sombere/slaaf |
| V | DiffPred | De/agent/sterft | De/agent/fraudeert |
| A | Opposite | De/knappe/inspecteur | Het/dove/slachtoffer |
| V | DiffSubj | De/psycholoog/bakt | Het/kind/bakt |
| V | Identity | De/dief/veroordeelt | De/dief/veroordeelt |
| V | DiffSubj | De/crimineel/helpt | De/stalker/helpt |
| V | DiffSubj | De/schrijver/vangt | De/redacteur/vangt |
| V | DiffSubj | De/groenteman/wint | De/slager/wint |
| A | DiffSubj | De/glinsterende/gijzelaar | De/glinsterende/orthodontist |
| V | DiffPred | De/activist/controleert | De/activist/onderzoekt |
| A | DiffPred | De/zachte/machinist | De/jonge/machinist |
| A | DiffSubj | De/sombere/goochelaar | De/sombere/acrobaat |
| A | DiffPred | De/zachte/hertog | De/jonge/hertog |
| V | Opposite | De/inspecteur/valt | Het/slachtoffer/springt |
| V | Identity | De/crimineel/helpt | De/crimineel/helpt |
| A | DiffPred | De/rode/dief | De/blauwe/dief |
| V | Opposite | De/chirurg/valt/aan | De/huisarts/danst |
| A | DiffPred | De/blije/verpleegster | De/teleurgestelde/verpleegster |
| V | DiffPred | De/crimineel/valt | De/crimineel/springt |
| A | Opposite | De/ruwe/inspecteur | Het/harde/slachtoffer |
| V | DiffPred | De/crimineel/valt/aan | De/crimineel/danst |
| A | DiffPred | De/glanzende/gijzelaar | De/glimmende/gijzelaar |
| A | DiffSubj | De/glanzende/zanger | De/glanzende/gitarist |
| V | Opposite | De/dief/krijgt | De/minister/koopt |
| V | Identity | De/gijzelaar/verbergt | De/gijzelaar/verbergt |
| V | Identity | De/bezoeker/zingt | De/bezoeker/zingt |
| V | DiffSubj | De/inspecteur/vangt | Het/slachtoffer/vangt |
| V | DiffSubj | De/hertog/besproeit | De/koning/besproeit |
| A | DiffPred | De/doffe/bezoeker | De/nieuwe/bezoeker |
| A | DiffSubj | De/geschikte/agent | De/geschikte/monteur |
| V | Opposite | De/bezoeker/hypnotiseert | De/acteur/betovert |
| A | DiffPred | De/bruine/jongen | De/luidruchtige/jongen |
| A | Opposite | De/onbeleefde/schrijver | De/botte/redacteur |
| A | DiffPred | De/boze/hertog | De/verdrietige/hertog |
| A | Opposite | De/magere/meester | De/leuke/slaaf |
| V | Identity | De/zanger/controleert | De/zanger/controleert |
| V | Opposite | De/groenteman/verlaat | De/slager/betreedt |
| V | DiffPred | De/gijzelaar/fluit | De/gijzelaar/wijst/af |
| V | Opposite | De/brandweerman/traint | De/dirigent/kookt |
| A | DiffSubj | De/blije/verpleegster | De/blije/leraar |
| A | Opposite | De/zachte/kapper | De/jonge/jager |
| A | Opposite | De/sombere/meester | De/depressieve/slaaf |
| A | Identity | De/bedrieglijke/bezoeker | De/bedrieglijke/bezoeker |
| V | Identity | De/agent/ontvangt | De/agent/ontvangt |
| A | DiffPred | De/ruwe/inspecteur | De/harde/inspecteur |
| V | DiffSubj | De/chirurg/helpt | De/huisarts/helpt |
| A | Opposite | De/gladde/psycholoog | Het/groene/kind |
| V | Identity | De/hertog/besproeit | De/hertog/besproeit |
| A | Identity | De/knappe/schrijver | De/knappe/schrijver |
| V | Opposite | De/student/fluit | De/scholier/wijst/af |
| V | Opposite | De/machinist/besproeit | De/conducteur/geeft |
| V | DiffSubj | De/moeder/drinkt | De/vader/drinkt |
| A | Identity | De/roze/student | De/roze/student |
| V | Identity | De/smid/verlaat | De/smid/verlaat |
| A | Opposite | De/magere/brandweerman | De/leuke/dirigent |
| V | Identity | De/agent/traint | De/agent/traint |
| V | DiffSubj | De/hertog/zingt | De/koning/zingt |
| V | DiffPred | De/smid/verlaat | De/smid/betreedt |
| A | DiffPred | De/doffe/hertog | De/nieuwe/hertog |
| V | Opposite | De/zanger/fluit | De/gitarist/wijst/af |
| V | Identity | De/activist/fluit | De/activist/fluit |
| V | DiffSubj | De/verpleegster/drinkt | De/leraar/drinkt |
| A | Identity | De/sombere/goochelaar | De/sombere/goochelaar |
| A | Opposite | De/onbeleefde/chirurg | De/botte/huisarts |
| V | DiffPred | De/psycholoog/bakt | De/psycholoog/zit |
| V | Identity | De/student/fluit | De/student/fluit |
| A | Identity | De/onbeleefde/schrijver | De/onbeleefde/schrijver |
| A | Identity | De/bedrieglijke/hertog | De/bedrieglijke/hertog |
| V | DiffPred | De/kapper/besproeit | De/kapper/geeft |
| V | DiffPred | De/goochelaar/sterft/ | De/goochelaar/fraudeert |
| A | Opposite | De/bruine/moeder | De/luidruchtige/vader |
| A | DiffSubj | De/enge/moeder | De/enge/vader |
| A | DiffPred | De/gladde/groenteman | De/groene/groenteman |
| A | DiffSubj | De/roze/zanger | De/roze/gitarist |
| V | Opposite | De/gijzelaar/verbergt | De/orthodontist/verstopt |
| V | DiffPred | De/brandweerman/traint | De/brandweerman/kookt |
| A | DiffSubj | De/geschikte/brandweerman | De/geschikte/dirigent |
| A | Opposite | De/zachte/hertog | De/jonge/koning |
| A | Identity | De/trouwe/goochelaar | De/trouwe/goochelaar |
| V | Identity | De/meester/ontvangt | De/meester/ontvangt |
| A | Identity | De/energieke/groenteman | De/energieke/groenteman |
| A | Opposite | De/sterke/gijzelaar | De/zwakke/orthodontist |
| A | DiffPred | De/trouwe/agent | De/dankbare/agent |
| V | Identity | De/smid/pakt | De/smid/pakt |
| V | Identity | De/chirurg/valt | De/chirurg/valt |
| A | DiffPred | De/sombere/meester | De/depressieve/meester |
| A | Identity | De/geweldige/smid | De/geweldige/smid |
| A | DiffPred | De/onbeleefde/inspecteur | De/botte/inspecteur |
| A | DiffPred | De/doffe/machinist | De/nieuwe/machinist |
| V | Opposite | De/goochelaar/beschermt | De/acrobaat/verdedigt |
| V | Opposite | De/dief/schildert | De/minister/bereidt |
| A | DiffPred | De/rode/moeder | De/blauwe/moeder |
| V | Identity | De/prinses/wint | De/prinses/wint |
| V | Opposite | De/schrijver/valt/aan | De/redacteur/danst |
| A | Opposite | De/roze/zanger | De/trage/gitarist |
| A | DiffPred | De/zachte/bezoeker | De/jonge/bezoeker |
| A | DiffSubj | De/onbeleefde/crimineel | De/onbeleefde/stalker |
| A | Opposite | De/sombere/agent | De/depressieve/monteur |
| A | DiffSubj | De/enge/verpleegster | De/enge/leraar |
| A | Opposite | De/magere/goochelaar | De/leuke/acrobaat |
| A | DiffPred | De/sombere/agent | De/depressieve/agent |
| V | DiffPred | De/goochelaar/traint | De/goochelaar/kookt |
| A | Opposite | De/doffe/hertog | De/nieuwe/koning |
| A | Identity | De/zachte/bezoeker | De/zachte/bezoeker |
| V | DiffPred | De/machinist/hypnotiseert | De/machinist/betovert |
| A | Opposite | De/trouwe/meester | De/dankbare/slaaf |
| V | Identity | De/schrijver/helpt | De/schrijver/helpt |
| A | DiffPred | De/knappe/schrijver | De/dove/schrijver |
| A | DiffPred | De/enge/jongen | De/dramatische/jongen |
| V | Identity | De/dief/schildert | De/dief/schildert |
| V | Opposite | De/chirurg/vangt | De/huisarts/gooit |
| V | Identity | De/meester/sterft | De/meester/sterft |
| A | DiffPred | De/blije/moeder | De/teleurgestelde/moeder |
| A | Identity | De/knappe/inspecteur | De/knappe/inspecteur |
| A | Identity | De/oranje/smid | De/oranje/smid |
| A | DiffSubj | De/ruwe/crimineel | De/ruwe/stalker |
| V | DiffPred | De/bezoeker/zingt | De/bezoeker/luistert |
| A | DiffSubj | De/geschikte/goochelaar | De/geschikte/acrobaat |
| A | Opposite | De/dappere/schrijver | De/heldhaftige/redacteur |
| A | Identity | De/gladde/prinses | De/gladde/prinses |
| A | DiffPred | De/bedrieglijke/machinist | De/kwaadaardige/machinist |
| A | DiffPred | De/sterke/gijzelaar | De/zwakke/gijzelaar |
| V | Identity | De/dief/drinkt | De/dief/drinkt |
| V | DiffPred | De/psycholoog/verlaat | De/psycholoog/betreedt |
| A | Opposite | De/doffe/kapper | De/nieuwe/jager |
| V | Identity | De/activist/schrijft | De/activist/schrijft |
| A | DiffSubj | De/zachte/kapper | De/zachte/jager |
| V | Opposite | De/hertog/hypnotiseert | De/koning/betovert |
| A | DiffPred | De/geweldige/groenteman | De/fantastische/groenteman |
| V | DiffSubj | De/verpleegster/krijgt | De/leraar/krijgt |
| A | Opposite | De/bedrieglijke/hertog | De/kwaadaardige/koning |
| A | DiffSubj | De/glanzende/gijzelaar | De/glanzende/orthodontist |
| V | Identity | De/jongen/schildert | De/jongen/schildert |
| V | DiffSubj | De/prinses/bakt | De/prins/bakt |
| A | DiffSubj | De/knappe/crimineel | De/knappe/stalker |
| A | Opposite | De/onbeleefde/inspecteur | Het/botte/slachtoffer |
| V | Opposite | De/brandweerman/beschermt | De/dirigent/verdedigt |
| V | Opposite | De/kapper/besproeit | De/jager/geeft |
| A | Opposite | De/glinsterende/activist | De/paarse/moordenaar |
| V | Identity | De/student/controleert | De/student/controleert |
| A | DiffSubj | De/glinsterende/zanger | De/glinsterende/gitarist |
| A | Identity | De/geschikte/meester | De/geschikte/meester |
| V | DiffPred | De/verpleegster/drinkt | De/verpleegster/eet |
| V | DiffPred | De/inspecteur/vangt | De/inspecteur/gooit |
| A | Identity | De/bruine/verpleegster | De/bruine/verpleegster |
| V | DiffSubj | De/agent/traint | De/monteur/traint |
| V | DiffPred | De/jongen/krijgt | De/jongen/koopt |
| A | Opposite | De/gladde/groenteman | De/groene/slager |
| V | DiffPred | De/crimineel/helpt | De/crimineel/bidt |
| V | DiffSubj | De/psycholoog/wint | Het/kind/wint |
| A | DiffSubj | De/zachte/bezoeker | De/zachte/acteur |
| A | DiffPred | De/energieke/smid | De/vermoeide/smid |
| A | DiffSubj | De/bedrieglijke/machinist | De/bedrieglijke/conducteur |
| V | DiffSubj | De/meester/beschermt | De/slaaf/beschermt |
| A | Identity | De/magere/agent | De/magere/agent |
| V | DiffSubj | De/zanger/controleert | De/gitarist/controleert |
| V | Opposite | De/gijzelaar/fluit | De/orthodontist/wijst/af |
| A | DiffSubj | De/enge/jongen | Het/enge/meisje |
| V | DiffPred | De/chirurg/helpt | De/chirurg/bidt |
| V | DiffPred | De/meester/beschermt | De/meester/verdedigt |
| V | DiffSubj | De/hertog/citeert | De/koning/citeert |
| V | Opposite | De/schrijver/helpt | De/redacteur/bidt |
| V | Opposite | De/jongen/krijgt | Het/meisje/koopt |
| A | DiffSubj | De/geschikte/meester | De/geschikte/slaaf |
| V | Opposite | De/hertog/besproeit | De/koning/geeft |
| A | DiffSubj | De/zachte/hertog | De/zachte/koning |
| V | DiffSubj | De/groenteman/verlaat | De/slager/verlaat |
| V | Identity | De/psycholoog/verlaat | De/psycholoog/verlaat |
| A | DiffPred | De/knappe/chirurg | De/dove/chirurg |
| V | DiffSubj | De/bezoeker/zingt | De/acteur/zingt |
| A | Identity | De/doffe/bezoeker | De/doffe/bezoeker |
| A | Identity | De/knappe/chirurg | De/knappe/chirurg |
| A | DiffSubj | De/rode/verpleegster | De/rode/leraar |
| V | DiffSubj | De/student/schrijft | De/scholier/schrijft |
| V | Opposite | De/activist/schrijft | De/moordenaar/vermoordt |
| A | Identity | De/glinsterende/zanger | De/glinsterende/zanger |
| A | DiffSubj | De/boze/bezoeker | De/boze/acteur |
| A | Opposite | De/roze/gijzelaar | De/trage/orthodontist |
| V | DiffSubj | De/chirurg/vangt | De/huisarts/vangt |
| V | DiffSubj | De/meester/ontvangt | De/slaaf/ontvangt |
| A | Opposite | De/geschikte/brandweerman | De/matige/dirigent |
| A | Identity | De/onbeleefde/crimineel | De/onbeleefde/crimineel |
| A | DiffSubj | De/roze/activist | De/roze/moordenaar |
| V | DiffSubj | De/groenteman/pakt | De/slager/pakt |
| A | Identity | De/glanzende/student | De/glanzende/student |
| A | Opposite | De/magere/agent | De/leuke/monteur |
| V | Opposite | De/inspecteur/vangt | Het/slachtoffer/gooit |
| V | DiffPred | De/chirurg/vangt | De/chirurg/gooit |
| V | DiffPred | De/dief/drinkt | De/dief/eet |
| V | DiffPred | De/gijzelaar/controleert | De/gijzelaar/onderzoekt |
| A | Opposite | De/rode/jongen | Het/blauwe/meisje |
| A | DiffPred | De/oranje/psycholoog | De/drukke/psycholoog |
| A | Opposite | De/rode/moeder | De/blauwe/vader |
| A | DiffSubj | De/gladde/prinses | De/gladde/prins |
| A | Opposite | De/glinsterende/gijzelaar | De/paarse/orthodontist |
| A | Opposite | De/energieke/psycholoog | Het/vermoeide/kind |
| V | DiffPred | De/dief/schildert | De/dief/bereidt |
| A | Identity | De/doffe/hertog | De/doffe/hertog |
| V | Identity | De/goochelaar/ontvangt | De/goochelaar/ontvangt |
| V | Opposite | De/hertog/zingt | De/koning/luistert |
| A | Identity | De/dappere/crimineel | De/dappere/crimineel |
| V | DiffSubj | De/dief/veroordeelt | De/minister/veroordeelt |
| A | Identity | De/ruwe/chirurg | De/ruwe/chirurg |
| A | Identity | De/sombere/brandweerman | De/sombere/brandweerman |
| V | DiffSubj | De/psycholoog/verlaat | Het/kind/verlaat |
| A | DiffSubj | De/magere/goochelaar | De/magere/acrobaat |
| A | DiffPred | De/boze/bezoeker | De/verdrietige/bezoeker |
| V | DiffSubj | De/smid/verlaat | De/piraat/verlaat |
| A | Opposite | De/blije/verpleegster | De/teleurgestelde/leraar |
| V | DiffSubj | De/student/fluit | De/scholier/fluit |
| V | Opposite | De/dief/veroordeelt | De/minister/typt |
| A | Opposite | De/bedrieglijke/machinist | De/kwaadaardige/conducteur |
| V | DiffSubj | De/jongen/veroordeelt | Het/meisje/veroordeelt |
| V | Opposite | De/gijzelaar/controleert | De/orthodontist/onderzoekt |
| V | Opposite | De/machinist/zingt | De/conducteur/luistert |
| A | Opposite | De/zachte/bezoeker | De/jonge/acteur |
| A | DiffSubj | De/doffe/machinist | De/doffe/conducteur |
| V | Opposite | De/inspecteur/helpt | Het/slachtoffer/bidt |
| A | DiffPred | De/onbeleefde/chirurg | De/botte/chirurg |
| A | Opposite | De/glanzende/gijzelaar | De/glimmende/orthodontist |
| V | DiffSubj | De/meester/traint | De/slaaf/traint |
| A | DiffPred | De/onbeleefde/crimineel | De/botte/crimineel |
| V | Identity | De/hertog/citeert | De/hertog/citeert |
| V | DiffSubj | De/schrijver/valt | De/redacteur/valt |
| A | DiffPred | De/bruine/dief | De/luidruchtige/dief |
| A | DiffSubj | De/doffe/hertog | De/doffe/koning |
| A | DiffSubj | De/bedrieglijke/bezoeker | De/bedrieglijke/acteur |
| A | Opposite | De/energieke/groenteman | De/vermoeide/slager |
| V | DiffPred | De/jongen/veroordeelt | De/jongen/typt |
| A | Identity | De/geschikte/brandweerman | De/geschikte/brandweerman |
| V | DiffPred | De/machinist/besproeit | De/machinist/geeft |
| V | Opposite | De/moeder/schildert | De/vader/bereidt |
| A | DiffPred | De/knappe/crimineel | De/dove/crimineel |
| V | Opposite | De/activist/fluit | De/moordenaar/wijst/af |
| V | DiffPred | De/schrijver/valt | De/schrijver/springt |
| V | Opposite | De/smid/pakt | De/piraat/ziet |
| V | Identity | De/meester/beschermt | De/meester/beschermt |
| A | Opposite | De/blije/jongen | Het/teleurgestelde/meisje |
| A | DiffPred | De/geweldige/smid | De/fantastische/smid |
| A | Identity | De/boze/machinist | De/boze/machinist |
| A | DiffSubj | De/rode/jongen | Het/rode/meisje |
| A | DiffSubj | De/bruine/moeder | De/bruine/vader |
| A | DiffSubj | De/roze/gijzelaar | De/roze/orthodontist |
| V | Identity | De/goochelaar/sterft/ | De/goochelaar/sterft/ |
| V | Identity | De/groenteman/bakt | De/groenteman/bakt |
| A | DiffSubj | De/blije/moeder | De/blije/vader |
| V | DiffSubj | De/activist/verbergt | De/moordenaar/verbergt |
| A | DiffSubj | De/bruine/jongen | Het/bruine/meisje |
| A | DiffSubj | De/gladde/psycholoog | Het/gladde/kind |
| V | Opposite | De/meester/beschermt | De/slaaf/verdedigt |
| A | Identity | De/boze/hertog | De/boze/hertog |
| V | DiffPred | De/brandweerman/sterft | De/brandweerman/fraudeert |
| A | Identity | De/geweldige/psycholoog | De/geweldige/psycholoog |
| V | DiffPred | De/bezoeker/hypnotiseert | De/bezoeker/betovert |
| A | Opposite | De/boze/machinist | De/verdrietige/conducteur |
| A | Opposite | De/enge/dief | De/dramatische/minister |
| A | DiffSubj | De/boze/hertog | De/boze/koning |
| A | DiffPred | De/sombere/brandweerman | De/depressieve/brandweerman |
| A | DiffPred | De/energieke/prinses | De/vermoeide/prinses |
| V | DiffSubj | De/prinses/verlaat | De/prins/verlaat |
| V | DiffPred | De/prinses/pakt | De/prinses/ziet |
| V | Identity | De/chirurg/valt/aan | De/chirurg/valt/aan |
| V | DiffSubj | De/prinses/pakt | De/prins/pakt |
| V | DiffSubj | De/kapper/citeert | De/jager/citeert |
| V | Identity | De/activist/controleert | De/activist/controleert |
| A | DiffSubj | De/doffe/kapper | De/doffe/jager |
| V | DiffSubj | De/groenteman/bakt | De/slager/bakt |
| A | DiffPred | De/sterke/activist | De/zwakke/activist |
| A | DiffSubj | De/energieke/psycholoog | Het/energieke/kind |
| V | Identity | De/dief/krijgt | De/dief/krijgt |
| V | DiffSubj | De/prinses/wint | De/prins/wint |
| V | Identity | De/student/schrijft | De/student/schrijft |
| V | DiffSubj | De/activist/schrijft | De/moordenaar/schrijft |
| V | DiffSubj | De/moeder/veroordeelt | De/vader/veroordeelt |
| A | DiffPred | De/glanzende/zanger | De/glimmende/zanger |
| V | Identity | De/inspecteur/vangt | De/inspecteur/vangt |
| A | Identity | De/sterke/activist | De/sterke/activist |
| A | DiffSubj | De/trouwe/agent | De/trouwe/monteur |
| A | DiffPred | De/bruine/moeder | De/luidruchtige/moeder |
| A | DiffPred | De/rode/jongen | De/blauwe/jongen |
| V | Opposite | De/psycholoog/verlaat | Het/kind/betreedt |
| V | DiffSubj | De/dief/drinkt | De/minister/drinkt |
| V | DiffSubj | De/kapper/hypnotiseert | De/jager/hypnotiseert |
| A | Identity | De/gladde/smid | De/gladde/smid |
| V | Opposite | De/activist/controleert | De/moordenaar/onderzoekt |
| V | Opposite | De/agent/ontvangt | De/monteur/verstuurt |
| V | DiffPred | De/moeder/veroordeelt | De/moeder/typt |
| A | Identity | De/boze/kapper | De/boze/kapper |
| A | Identity | De/ruwe/inspecteur | De/ruwe/inspecteur |
| A | Opposite | De/geweldige/smid | De/fantastische/piraat |
| V | Identity | De/chirurg/vangt | De/chirurg/vangt |
| A | DiffSubj | De/sombere/brandweerman | De/sombere/dirigent |
| V | Identity | De/agent/sterft | De/agent/sterft |
| A | Identity | De/geweldige/prinses | De/geweldige/prinses |
| A | Opposite | De/bruine/dief | De/luidruchtige/minister |
| A | DiffPred | De/enge/verpleegster | De/dramatische/verpleegster |
| V | DiffPred | De/meester/traint | De/meester/kookt |
| V | Opposite | De/dief/drinkt | De/minister/eet |
| A | Identity | De/sombere/meester | De/sombere/meester |
| V | Opposite | De/moeder/drinkt | De/vader/eet |
| V | DiffSubj | De/bezoeker/besproeit | De/acteur/besproeit |
| V | Opposite | De/psycholoog/pakt | Het/kind/ziet |
